# Supplementary material for: Analysis of 2897 hospitalization events for patients with chronic kidney disease: results from CKD-JAC study
Source: Clin Exp Nephrol. 2019 Apr 9;23(7):956–68. doi: 10.1007/s10157-019-01730-9 (PMC6555784; doi:10.1007/s10157-019-01730-9)
Supplement: Supplementary file 2 — Supplementary material 2 (XLSX 55 KB) [file 10157_2019_1730_MOESM2_ESM.xlsx]

## Sheet: 厚労A分類vsICD10
	Analysis of 2897 hospitalization events for patients with chronic kidney disease: Results from CKD-JAC study, Clinical and Experimental Nephrology, Iimuro et al.
	Supplementary Table 1 Classification of Diseases for Hospitalization
	1a) Relationships between Chapters and Blocks from the ICD10 10th Revision Version for 2003 and Major Classification Codes in the Japanese Ministry of Health, Labour and Welfare (MHLW) Disease Classifications
	International Statistical Classification of Diseases and Related Health Problems 10th Revision Version for 2003			Classification of Diseases by Ministry of Health, Labour and Welfare of Japan
	Chapter	Blocks	Title
	Ⅰ	A00-B99	Certain infectious and parasitic diseases	a-0100
		A00-A09	Intestinal infectious diseases	a-0101
		A15-A19	Tuberculosis	a-0102
		B00-B09	Viral infections characterized by skin and mucous membrane lesions	a-0103
		B35-B49	Mycoses	a-0104
		residual code of A00-B99	Other infectious or parasitic diseases	a-0105
	II	C00-D48	Neoplasms	a-0200
		C16	Malignant neoplasm of stomach	a-0201
		C18-C20	Malignant neoplasm of colon, rectosigmoid junction and rectum	a-0202
		C33-C34	Malignant neoplasm of trachea, bronchus and lung	a-0203
		C00-C15,C17,C21-C32,C37-C97	Other malignant neoplasm	a-0204
	III	D00-D48	In situ neoplasms / Benign neoplasms / Neoplasms of uncertain or unknown behaviour	a-0205
		D50-D89	Diseases of the blood and blood-forming organs and certain disorders involving the immune mechanism	a-0300
		D50-D64	Nutritional anaemias / Haemolytic anaemias / Aplastic and other anaemias	a-0301
		D65-D89	Coagulation defects, purpura and other haemorrhagic conditions / Other diseases of blood and blood-forming organs / Certain disorders involving the immune mechanism	a-0302
	IV	E00-E90	Endocrine, nutritional and metabolic diseases	a-0400
		E00-E07	Disorders of thyroid gland	a-0401
		E10-E14	Diabetes mellitus	a-0402
		E15-E90	Other disorders of glucose regulation and pancreatic internal secretion	a-0403
	V	F00-F99	Mental and behavioural disorders	a-0500
		F20-F29	Schizophrenia, schizotypal and delusional disorders	a-0501
		F30-F39	Mood [affective] disorders	a-0502
		F40-F48	Neurotic, stress-related and somatoform disorders	a-0503
		F00-F19,F50-F99	Other mental or behavioural disorders	a-0504
	VI	G00-G99	Diseases of the nervous system	a-0600
	VII	H00-H59	Diseases of the eye and adnexa	a-0700
		H25-H26	Cataract	a-0701
		H00-H22,H27-H59	Other disease of the eye or adnexa	a-0702
	VIII	H60-H95	Diseases of the ear and mastoid process	a-0800
		H60-H62	Diseases of external ear	a-0801
		H65-H67	Diseases of middle ear and mastoid	a-0802
		H68-H75	Other diseases of middle ear and mastoid	a-0803
		H80-H83	Diseases of inner ear	a-0804
		H90-H95	Other disease of the ear	a-0805
	IX	I00-I99	Diseases of the circulatory system	a-0900
		I10-I15	Hypertensive diseases	a-0901
		I20-I25	Ischaemic heart diseases	a-0902
		I01-I02.0,I05-I09,I27,I30-I52	Other heart diseases	a-0903
		I63,I69.3	Cerebral infarction	a-0904
		I60-I62,I64-I68,I69.0-I69.2, I69.4-I69.8	Other cerebrovascular diseases	a-0905
		I00,I02.9,I26,I28,I70-I99	Other diseases of the circulatory system	a-0906
	X	J00-J99	Diseases of the respiratory system	a-1000
		J00-J06	Acute upper respiratory infections	a-1001
		J12-J18	Viral pneumonia	a-1002
		J20-J21	Acute bronchiolitis	a-1003
		J40-J44	Bronchitis	a-1004
		J45-J46	Asthma	a-1005
		residual code of J00-J99	Other diseases of the respiratory system	a-1006
	XI	K00-K93	Diseases of the digestive system	a-1100
		K02	Dental caries	a-1101
		K05	Gingivitis and periodontal diseases	a-1102
		K00-K01, K03-K04, K06-K08	Other dental, gingivitis or periodontal diseases	a-1103
		K25-K27	Gastric ulcer / Duodenal ulcer / Peptic ulcer, site unspecified	a-1104
		K29	Gastritis and duodenitis	a-1105
		K70-K77	Diseases of liver	a-1106
		residual code of K00-K93	Other diseases of the digestive system	a-1107
	XII	L00-L99	Diseases of the skin and subcutaneous tissue	a-1200
	XIII	M00-M99	Diseases of the musculoskeletal system and connective tissue	a-1300
		M05-M14	Inflammatory polyarthropathies	a-1301
		M40-M54	Dorsopathies	a-1302
		M80-M85	Disorders of bone density and structure	a-1303
		residual code of M00-M99	Other diseases of the musculoskeletal system or connective tissue	a-1304
	XIV	N00-N99	Diseases of the genitourinary system	a-1400
		N00-N19	Glomerular diseases / Renal tubulo-interstitial diseases / Renal failure	a-1401
		N60-N98, N99.2-N99.3	Disorders of breast / Inflammatory diseases of female pelvic organs / Noninflammatory disorders of female genital tract / Postoperative adhesions of vagina / Prolapse of vaginal vault after hysterectomy	a-1402
		residual code of N00-N99	Other diseases of the genitourinary system	a-1403
	XV	O00-O99	Pregnancy, childbirth and the puerperium	a-1500
		O00-O08	Pregnancy with abortive outcome	a-1501
		O10-O16	Oedema, proteinuria and hypertensive disorders in pregnancy, childbirth and the puerperium	a-1502
		O80	Single spontaneous delivery	a-1503
		O20-O75,O81-O99	Other pregnancy, childbirth or the puerperium	a-1504
	XVI	P00-P96	Certain conditions originating in the perinatal period	a-1600
	XVII	Q00-Q99	Congenital malformations, deformations and chromosomal abnormalities	a-1700
	XVIII	R00-R99	Symptoms, signs and abnormal clinical and laboratory findings, not elsewhere classified	a-1800
	XIX	S00-T98	Injury, poisoning and certain other consequences of external causes	a-1900
		S02,S12,S22,S32,S42,S52,S62,S72,S82,S92,T02,T08,T10,T12	Fracture	a-1901
		residual code of S00-T98	Others	a-1902
	XXI	Z00-Z99	Factors influencing health status and contact with health services	a-2100
		Z30-Z39	Persons encountering health services in circumstances related to reproduction	a-2101
		Z46.3-Z46.4	Fitting and adjustment of dental prosthetic device / Fitting and adjustment of orthodontic device	a-2102
		residual code of Z00-Z99	Others	a-2103
	XXII	Ｕ00-Ｕ99	Codes for special purposes	a-2200
		Ｕ04	SARS	a-2210
		residual code of U00-U99	Others	a-2220

## Sheet: Sheet1
疾病分類表
疾病分類表（大分類）
分類名		ICD-10 (2003)
a-0100	感染症及び寄生虫症	A00-B99	Certain infectious and parasitic diseases
a-0101	腸管感染症	A00-A09	Intestinal infectious diseases
a-0102	結核	A15-A19	Tuberculosis
a-0103	皮膚及び粘膜の病変を伴うウイルス疾患	B00-B09	Viral infections characterized by skin and mucous membrane lesions
a-0104	真菌症	B35-B49	Mycoses
a-0105	その他の感染症及び寄生虫症	A00-B99の残り	Other infectious or parasitic diseases
a-0200	新生物	C00-D48	Neoplasms
	（悪性新生物）	（C00-C97）	Malignant neoplasm
a-0201	胃の悪性新生物	C16	Malignant neoplasm of stomach
a-0202	結腸及び直腸の悪性新生物	C18-C20	Malignant neoplasm of colon, rectosigmoid junction and rectum
a-0203	気管，気管支及び肺の悪性新生物	C33-C34	Malignant neoplasm of trachea, bronchus and lung
a-0204	その他の悪性新生物	C00-C15,C17,C21-C32,C37-C97	Other malignant neoplasm
a-0205	良性新生物及びその他の新生物	D00-D48	In situ neoplasms / Benign neoplasms / Neoplasms of uncertain or unknown behaviour
a-0300	血液及び造血器の疾患並びに免疫機構の障害	D50-D89	Diseases of the blood and blood-forming organs and certain disorders involving the immune mechanism
a-0301	貧血	D50-D64	Nutritional anaemias / Haemolytic anaemias / Aplastic and other anaemias
a-0302	その他の血液及び造血器の疾患並びに免疫 機構の障害	D65-D89	Coagulation defects, purpura and other haemorrhagic conditions / Other diseases of blood and blood-forming organs / Certain disorders involving the immune mechanism
a-0400	内分泌，栄養及び代謝疾患	E00-E90	Endocrine, nutritional and metabolic diseases
a-0401	甲状腺障害	E00-E07	Disorders of thyroid gland
a-0402	糖尿病	E10-E14	Diabetes mellitus
a-0403	その他の内分泌，栄養及び代謝疾患	E15-E90	Other disorders of glucose regulation and pancreatic internal secretion
a-0500	精神及び行動の障害	F00-F99	Mental and behavioural disorders
a-0501	統合失調症，統合失調症型障害及び妄想性障害	F20-F29	Schizophrenia, schizotypal and delusional disorders
a-0502	気分［感情］障害（躁うつ病を含む）	F30-F39	Mood [affective] disorders
a-0503	神経症性障害，ストレス関連障害及び身体表現性障害	F40-F48	Neurotic, stress-related and somatoform disorders
a-0504	その他の精神及び行動の障害	F00-F19,F50-F99	Other mental or behavioural disorders
a-0600	神経系の疾患	G00-G99	Diseases of the nervous system
a-0700	眼及び付属器の疾患	H00-H59	Diseases of the eye and adnexa
a-0701	白内障	H25-H26	Catarct
a-0702	その他の眼及び付属器の疾患	H00-H22,H27-H59	Other disease of the eye or adnexa
a-0800	耳及び乳様突起の疾患	H60-H95	Diseases of the ear and mastoid process
a-0801	外耳疾患	H60-H62	Diseases of external ear
a-0802	中耳炎	H65-H67	Diseases of middle ear and mastoid
a-0803	その他の中耳及び乳様突起の疾患	H68-H75	Other diseases of middle ear and mastoid
a-0804	内耳疾患	H80-H83	Diseases of inner ear
a-0805	その他の耳疾患	H90-H95	Other disease of the ear
a-0900	循環器系の疾患	I00-I99	Diseases of the circulatory system
a-0901	高血圧性疾患	I10-I15	Hypertensive diseases
	（心疾患（高血圧性のものを除く））	（I01-I02.0,I05-I09,I20-I25, I27,I30-I52)
a-0902	虚血性心疾患	I20-I25	Ischaemic heart diseases
a-0903	その他の心疾患	I01-I02.0,I05-I09,I27,I30-I52	Other heart diseases
	（脳血管疾患）	（I60-I69）
a-0904	脳梗塞	I63,I69.3	Cerebral infarction
a-0905	その他の脳血管疾患	I60-I62,I64-I68,I69.0-I69.2, I69.4-I69.8	Other cerebrovascular diseases
a-0906	その他の循環器系の疾患	I00,I02.9,I26,I28,I70-I99	Other diseases of the circulatory system
a-1000	呼吸器系の疾患	J00-J99	Diseases of the respiratory system
a-1001	急性上気道感染症	J00-J06	Acute upper respiratory infections
a-1002	肺炎	J12-J18	Viral pneumonia
a-1003	急性気管支炎及び急性細気管支炎	J20-J21	Acute bronchiolitis
a-1004	気管支炎及び慢性閉塞性肺疾患	J40-J44	Bronchitis
a-1005	喘息	J45-J46	Asthma
a-1006	その他の呼吸器系の疾患	J00-J99の残り	Other diseases of the respiratory system
a-1100	消化器系の疾患	K00-K93	Diseases of the digestive system
a-1101	う蝕	K02	Dental caries
a-1102	歯肉炎及び歯周疾患	K05	Gingivitis and periodontal diseases
a-1103	その他の歯及び歯の支持組織の障害	K00-K01, K03-K04, K06-K08	Other dental, gingivitis or periodontal diseases
a-1104	胃潰瘍及び十二指腸潰瘍	K25-K27	Gastric ulcer / Duodenal ulcer / Peptic ulcer, site unspecified
a-1105	胃炎及び十二指腸炎	K29	Gastritis and duodenitis
a-1106	肝疾患	K70-K77	Diseases of liver
a-1107	その他の消化器系の疾患	K00-K93の残り	Other diseases of the digestive system
a-1200	皮膚及び皮下組織の疾患	L00-L99	Diseases of the skin and subcutaneous tissue
a-1300	筋骨格系及び結合組織の疾患	M00-M99	Diseases of the musculoskeletal system and connective tissue
a-1301	炎症性多発性関節障害	M05-M14	Inflammatory polyarthropathies
a-1302	脊柱障害	M40-M54	Dorsopathies
a-1303	骨の密度及び構造の障害	M80-M85	Disorders of bone density and structure
a-1304	その他の筋骨格系及び結合組織の疾患	M00-M99の残り	Other diseases of the musculoskeletal system or connective tissue
a-1400	腎尿路生殖器系の疾患	N00-N99	Diseases of the genitourinary system
a-1401	糸球体疾患，腎尿細管間質性疾患及び腎不全	N00-N19	Glomerular diseases / Renal tubulo-interstitial diseases / Renal failure
a-1402	乳房及び女性生殖器の疾患	N60-N98, N99.2-N99.3	Disorders of breast / Inflammatory diseases of female pelvic organs / Noninflammatory disorders of female genital tract / Postoperative adhesions of vagina / Prolapse of vaginal vault after hysterectomy
a-1403	その他の腎尿路生殖器系の疾患	N00-N99の残り	Other diseases of the genitourinary system
a-1500	妊娠，分娩及び産じょく	O00-O99	Pregnancy, childbirth and the puerperium
a-1501	流産	O00-O08	Pregnancy with abortive outcome
a-1502	妊娠高血圧症候群	O10-O16	Oedema, proteinuria and hypertensive disorders in pregnancy, childbirth and the puerperium
a-1503	単胎自然分娩	O80	Single spontaneous delivery
a-1504	その他の妊娠，分娩及び産じょく	O20-O75,O81-O99	Other pregnancy, childbirth or the puerperium
a-1600	周産期に発生した病態	P00-P96	Certain conditions originating in the perinatal period
a-1700	先天奇形，変形及び染色体異常	Q00-Q99	Congenital malformations, deformations and chromosomal abnormalities
a-1800	症状，徴候及び異常臨床所見・異常検査所見で他に分類されないもの	R00-R99	Symptoms, signs and abnormal clinical and laboratory findings, not elsewhere classified
a-1900	損傷，中毒及びその他の外因の影響	S00-T98	Injury, poisoning and certain other consequences of external causes
a-1901	骨折	S02,S12,S22,S32,S42,S52,S62,S72,S82,S92,T02,T08,T10,T12	Fracture
a-1902	その他の損傷，中毒及びその他の外因の影響	S00-T98の残り	Others
a-2100	健康状態に影響を及ぼす要因及び保健サービスの利用	Z00-Z99	Factors influencing health status and contact with health services
a-2101	正常妊娠及び産じょくの管理並びに家族計画	Z30-Z39	Persons encountering health services in circumstances related to reproduction
a-2102	歯の補てつ	Z46.3-Z46.4	Fitting and adjustment of dental prosthetic device / Fitting and adjustment of orthodontic device
a-2103	その他の健康状態に影響を及ぼす要因及び保健サービスの利用	Z00-Z99の残り	Others
a-2200	特殊目的用コード	Ｕ00－Ｕ99	Codes for special purposes
a-2210	重症急性呼吸器症候群［ＳＡＲＳ］	Ｕ04	SARS
a-2220	その他の特殊目的用コード	Ｕ00－Ｕ99の残り	Others
疾病分類表（中分類）
分類名		基本分類コード	大分類コード
b-0100	感染症及び寄生虫症	A00-B99	a-0100
b-0101	腸管感染症	A00-A09	a-0101
b-0102	結核	A15-A19	a-0102
b-0103	主として性的伝播様式をとる感染症	A50-A64	a-0105
b-0104	皮膚及び粘膜の病変を伴うウイルス疾患	B00-B09	a-0103
b-0105	ウイルス肝炎	B15-B19	a-0105
b-0106	その他のウイルス疾患	A80-A99,B20-B34	a-0105
b-0107	真菌症	B35-B49	a-0104
b-0108	感染症及び寄生虫症の続発・後遺症	B90-B94	a-0105
b-0109	その他の感染症及び寄生虫症	A00-B99の残り	a-0105
b-0200	新生物	C00-D48	a-0200
b-0201	胃の悪性新生物	C16	a-0201
b-0202	結腸の悪性新生物	C18	a-0202
b-0203	直腸Ｓ状結腸移行部及び直腸の悪性新生物	C19-C20	a-0202
b-0204	肝及び肝内胆管の悪性新生物	C22	a-0204
b-0205	気管，気管支及び肺の悪性新生物	C33-C34	a-0203
b-0206	乳房の悪性新生物	C50	a-0204
b-0207	子宮の悪性新生物	C53-C55	a-0204
b-0208	悪性リンパ腫	C81-C85	a-0204
b-0209	白血病	C91-C95	a-0204
b-0210	その他の悪性新生物	C00-C97の残り	a-0204
b-0211	良性新生物及びその他の新生物	D00-D48	a-0205
b-0300	血液及び造血器の疾患並びに免疫機構の障害	D50-D89	a-0300
b-0301	貧血	D50-D64	a-0301
b-0302	その他の血液及び造血器の疾患並びに免疫機構の障害	D65-D89	a-0302
b-0400	内分泌，栄養及び代謝疾患	E00-E90	a-0400
b-0401	甲状腺障害	E00-E07	a-0401
b-0402	糖尿病	E10-E14	a-0402
b-0403	その他の内分泌，栄養及び代謝疾患	E15-E90	a-0403
b-0500	精神及び行動の障害	F00-F99	a-0500
b-0501	血管性及び詳細不明の認知症	F01,F03	a-0504
b-0502	精神作用物質使用による精神及び行動の障害	F10-F19	a-0504
b-0503	統合失調症，統合失調症型障害及び妄想性障害	F20-F29	a-0501
b-0504	気分［感情］障害 (躁うつ病を含む）	F30-F39	a-0502
b-0505	神経症性障害，ストレス関連障害及び身体表現性障害	F40-F48	a-0503
b-0506	知的障害＜精神遅滞＞	F70-F79	a-0504
b-0507	その他の精神及び行動の障害	F00-F99の残り	a-0504
b-0600	神経系の疾患	G00-G99	a-0600
b-0601	パーキンソン病	G20	a-0600
b-0602	アルツハイマー病	G30	a-0600
b-0603	てんかん	G40-G41	a-0600
b-0604	脳性麻痺及びその他の麻痺性症候群	G80-G83	a-0600
b-0605	自律神経系の障害	G90	a-0600
b-0606	その他の神経系の疾患	G00-G99の残り	a-0600
b-0700	眼及び付属器の疾患	H00-H59	a-0700
b-0701	結膜炎	H10	a-0702
b-0702	白内障	H25-H26	a-0701
b-0703	屈折及び調節の障害	H52	a-0702
b-0704	その他の眼及び付属器の疾患	H00-H59の残り	a-0702
b-0800	耳及び乳様突起の疾患	H60-H95	a-0800
b-0801	外耳炎	H60	a-0801
b-0802	その他の外耳疾患	H61-H62	a-0801
b-0803	中耳炎	H65-H67	a-0802
b-0804	その他の中耳及び乳様突起の疾患	H68-H75	a-0803
b-0805	メニエール病	H81.0	a-0804
b-0806	その他の内耳疾患	H80,H81.1-H83	a-0804
b-0807	その他の耳疾患	H90-H95	a-0805
b-0900	循環器系の疾患	I00-I99	a-0900
b-0901	高血圧性疾患	I10-I15	a-0901
b-0902	虚血性心疾患	I20-I25	a-0902
b-0903	その他の心疾患	I01-I02.0,I05-I09,I27,I30-I52	a-0903
b-0904	くも膜下出血	I60,I69.0	a-0905
b-0905	脳内出血	I61,I69.1	a-0905
b-0906	脳梗塞	I63,I69.3	a-0904
b-0907	脳動脈硬化（症）	I67.2	a-0905
b-0908	その他の脳血管疾患	I62,I64-I67.1,I67.3-I68,I69.2,I69.4-I69.8	a-0905
b-0909	動脈硬化（症）	I70	a-0906
b-0910	痔核	I84	a-0906
b-0911	低血圧（症）	I95	a-0906
b-0912	その他の循環器系の疾患	I00-I99の残り	a-0906
b-1000	呼吸器系の疾患	J00-J99	a-1000
b-1001	急性鼻咽頭炎［かぜ］＜感冒＞	J00	a-1001
b-1002	急性咽頭炎及び急性扁桃炎	J02-J03	a-1001
b-1003	その他の急性上気道感染症	J01,J04-J06	a-1001
b-1004	肺炎	J12-J18	a-1002
b-1005	急性気管支炎及び急性細気管支炎	J20-J21	a-1003
b-1006	アレルギ－性鼻炎	J30	a-1006
b-1007	慢性副鼻腔炎	J32	a-1006
b-1008	急性又は慢性と明示されない気管支炎	J40	a-1004
b-1009	慢性閉塞性肺疾患	J41-J44	a-1004
b-1010	喘息	J45-J46	a-1005
b-1011	その他の呼吸器系の疾患	J00-J99の残り	a-1006
b-1100	消化器系の疾患	K00-K93	a-1100
b-1101	う蝕	K02	a-1101
b-1102	歯肉炎及び歯周疾患	K05	a-1102
b-1103	その他の歯及び歯の支持組織の障害	K00-K01,K03-K04,K06-K08	a-1103
b-1104	胃潰瘍及び十二指腸潰瘍	K25-K27	a-1104
b-1105	胃炎及び十二指腸炎	K29	a-1105
b-1106	アルコール性肝疾患	K70	a-1106
b-1107	慢性肝炎（アルコール性のものを除く）	K73	a-1106
b-1108	肝硬変（アルコール性のものを除く）	K74.3-K74.6	a-1106
b-1109	その他の肝疾患	K71-K72,K74.0-K74.2,K75-K77	a-1106
b-1110	胆石症及び胆のう炎	K80-K81	a-1107
b-1111	膵疾患	K85-K86	a-1107
b-1112	その他の消化器系の疾患	K00-K93の残り	a-1107
b-1200	皮膚及び皮下組織の疾患	L00-L99	a-1200
b-1201	皮膚及び皮下組織の感染症	L00-L08	a-1200
b-1202	皮膚炎及び湿疹	L20-L30	a-1200
b-1203	その他の皮膚及び皮下組織の疾患	L10-L14,L40-L98	a-1200
b-1300	筋骨格系及び結合組織の疾患	M00-M99	a-1300
b-1301	炎症性多発性関節障害	M05-M14	a-1301
b-1302	関節症	M15-M19	a-1304
b-1303	脊椎障害（脊椎症を含む）	M45-M49	a-1302
b-1304	椎間板障害	M50-M51	a-1302
b-1305	頸腕症候群	M53.1	a-1302
b-1306	腰痛症及び坐骨神経痛	M54.3-M54.5	a-1302
b-1307	その他の脊柱障害	M40-M43, M53.0, M53.2-M53.9, M54.0-M54.2, M54.6-M54.9	a-1302
b-1308	肩の傷害＜損傷＞	M75	a-1304
b-1309	骨の密度及び構造の障害	M80-M85	a-1303
b-1310	その他の筋骨格系及び結合組織の疾患	M00-M99の残り	a-1304
b-1400	腎尿路生殖器系の疾患	N00-N99	a-1400
b-1401	糸球体疾患及び腎尿細管間質性疾患	N00-N16	a-1401
b-1402	腎不全	N17-N19	a-1401
b-1403	尿路結石症	N20-N23	a-1403
b-1404	その他の腎尿路系の疾患	N25-N39,N99.0-N99.1,N99.4-N99.9	a-1403
b-1405	前立腺肥大（症）	N40	a-1403
b-1406	その他の男性生殖器の疾患	N41-N51	a-1403
b-1407	月経障害及び閉経周辺期障害	N91-N92, N94.0,N94.3-N95	a-1402
b-1408	乳房及びその他の女性生殖器の疾患	N60-N90, N93, N94.1-N94.2,N96-N98,N99.2-N99.3	a-1402
b-1500	妊娠，分娩及び産じょく	O00-O99	a-1500
b-1501	流産	O00-O08	a-1501
b-1502	妊娠高血圧症候群	O10-O16	a-1502
b-1503	単胎自然分娩	O80	a-1503
b-1504	その他の妊娠，分娩及び産じょく	O20-O75,O81-O99	a-1504
b-1600	周産期に発生した病態	P00-P96	a-1600
b-1601	妊娠及び胎児発育に関連する障害	P05-P08	a-1600
b-1602	その他の周産期に発生した病態	P00-P04,P10-P96	a-1600
b-1700	先天奇形，変形及び染色体異常	Q00-Q99	a-1700
b-1701	心臓の先天奇形	Q20-Q24	a-1700
b-1702	その他の先天奇形，変形及び染色体異常	Q00-Q18,Q25-Q99	a-1700
b-1800	症状，徴候及び異常臨床所見・異常検査所見で他に分類されないもの	R00-R99	a-1800
b-1900	損傷，中毒及びその他の外因の影響	S00-T98	a-1900
b-1901	骨折	S02,S12,S22,S32,S42,S52,S62,S72,S82,S92,T02,T08,T10,T12	a-1901
b-1902	頭蓋内損傷及び内臓の損傷	S06,S26-S27,S36-S37	a-1902
b-1903	熱傷及び腐食	T20-T32	a-1902
b-1904	中毒	T36-T65	a-1902
b-1905	その他の損傷及びその他の外因の影響	S00-T98の残り	a-1902
b-2100	健康状態に影響を及ぼす要因及び保健サービスの利用	Z00-Z99	a-2100
b-2101	検査及び診査のための保健サービスの利用者	Z00-Z13	a-2103
b-2102	予防接種	Z23-Z27	a-2103
b-2103	正常妊娠及び産じょくの管理並びに家族計画	Z30-Z39	a-2101
b-2104	歯の補てつ	Z46.3-Z46.4	a-2102
b-2105	特定の処置（歯の補てつを除く）及び保健ケアのための保健サービスの利用者	Z40-Z46.2,Z46.5-Z54	a-2103
b-2106	その他の理由による保健サービスの利用者	Z00-Z99の残り	a-2103
b-2200	特殊目的用コード	Ｕ00－Ｕ99	a-2200
b-2210	重症急性呼吸器症候群［ＳＡＲＳ］	Ｕ04	a-2210
b-2220	その他の特殊目的用コード	Ｕ00－Ｕ99の残り	a-2220
疾病分類表（小分類）
分類名		基本分類コード	中分類コード
c-0100	感染症及び寄生虫症	A00-B99	b-0100
c-0101	原因の明示された腸管感染症	A00-A08	b-0101
c-0102	感染症と推定される下痢及び胃腸炎	A09	b-0101
c-0103	呼吸器結核	A15-A16	b-0102
c-0104	その他の結核	A17-A19	b-0102
c-0105	百日咳	A37	b-0109
c-0106	敗血症	A40-A41	b-0109
c-0107	その他の細菌性疾患	A20-A36,A38-A39,A42-A49	b-0109
c-0108	梅毒	A50-A53	b-0103
c-0109	淋菌感染症	A54	b-0103
c-0110	主として性的伝播様式をとるその他の感染症	A55-A64	b-0103
c-0111	ヘルペスウイルス感染症	B00	b-0104
c-0112	水痘	B01	b-0104
c-0113	帯状疱疹	B02	b-0104
c-0114	麻疹	B05	b-0104
c-0115	風疹	B06	b-0104
c-0116	皮膚及び粘膜の病変を伴うその他のウイルス疾患	B03-B04,B07-B09	b-0104
c-0117	Ｂ型ウイルス肝炎	B16-B17.0,B18.0-B18.1	b-0105
c-0118	Ｃ型ウイルス肝炎	B17.1,B18.2	b-0105
c-0119	その他のウイルス肝炎	B15-B19の残り	b-0105
c-0120	ヒト免疫不全ウイルス［ＨＩＶ］病	B20-B24	b-0106
c-0121	ムンプス	B26	b-0106
c-0122	その他のウイルス疾患	A80-A99,B25,B27-B34	b-0106
c-0123	皮膚糸状菌症	B35	b-0107
c-0124	カンジダ症	B37	b-0107
c-0125	その他の真菌症	B36,B38-B49	b-0107
c-0126	結核の続発・後遺症	B90	b-0108
c-0127	その他の感染症及び寄生虫症の続発・後遺症	B91-B94	b-0108
c-0128	その他の感染症及び寄生虫症	A00-B99の残り	b-0109
c-0200	新生物	C00-D48	b-0200
c-0201	口唇，口腔及び咽頭の悪性新生物	C00-C14	b-0210
c-0202	食道の悪性新生物	C15	b-0210
c-0203	胃の悪性新生物	C16	b-0201
c-0204	結腸の悪性新生物	C18	b-0202
c-0205	直腸Ｓ状結腸移行部及び直腸の悪性新生物	C19-C20	b-0203
c-0206	肛門及び肛門管の悪性新生物	C21	b-0210
c-0207	肝及び肝内胆管の悪性新生物	C22	b-0204
c-0208	胆のう及びその他の胆道の悪性新生物	C23-C24	b-0210
c-0209	膵の悪性新生物	C25	b-0210
c-0210	その他の消化器の悪性新生物	C17,C26	b-0210
c-0211	喉頭の悪性新生物	C32	b-0210
c-0212	気管，気管支及び肺の悪性新生物	C33-C34	b-0205
c-0213	その他の呼吸器及び胸腔内臓器の悪性新生物	C30-C31,C37-C39	b-0210
c-0214	骨及び関節軟骨の悪性新生物	C40-C41	b-0210
c-0215	皮膚の悪性黒色腫	C43	b-0210
c-0216	その他の皮膚の悪性新生物	C44	b-0210
c-0217	中皮及び軟部組織の悪性新生物	C45-C49	b-0210
c-0218	乳房の悪性新生物	C50	b-0206
c-0219	子宮頸（部）の悪性新生物	C53	b-0207
c-0220	子宮体（部）の悪性新生物	C54	b-0207
c-0221	子宮の部位不明の悪性新生物	C55	b-0207
c-0222	卵巣の悪性新生物	C56	b-0210
c-0223	その他の女性生殖器の悪性新生物	C51-C52,C57-C58	b-0210
c-0224	前立腺の悪性新生物	C61	b-0210
c-0225	その他の男性生殖器の悪性新生物	C60,C62-C63	b-0210
c-0226	腎及び腎盂の悪性新生物	C64-C65	b-0210
c-0227	膀胱の悪性新生物	C67	b-0210
c-0228	その他の尿路の悪性新生物	C66,C68	b-0210
c-0229	眼及び付属器の悪性新生物	C69	b-0210
c-0230	中枢神経系の悪性新生物	C70-C72,C75.1-C75.3	b-0210
c-0231	甲状腺の悪性新生物	C73	b-0210
c-0232	ホジキン病	C81	b-0208
c-0233	非ホジキンリンパ腫	C82-C85	b-0208
c-0234	白血病	C91-C95	b-0209
c-0235	その他のリンパ組織，造血組織及び関連組織の悪性新生物	C88-C90,C96	b-0210
c-0236	その他の悪性新生物	C00-C97の残り	b-0210
c-0237	子宮頸（部）の上皮内癌	D06	b-0211
c-0238	その他の上皮内新生物	D00-D05,D07-D09	b-0211
c-0239	皮膚の良性新生物	D22-D23	b-0211
c-0240	乳房の良性新生物	D24	b-0211
c-0241	子宮平滑筋腫	D25	b-0211
c-0242	卵巣の良性新生物	D27	b-0211
c-0243	腎尿路の良性新生物	D30	b-0211
c-0244	中枢神経系のその他の新生物	D32-D33,D35.2-D35.4,D42-D43,D44.3-D44.5	b-0211
c-0245	その他の新生物	D00-D48の残り	b-0211
c-0300	血液及び造血器の疾患並びに免疫機構の障害	D50-D89	b-0300
c-0301	鉄欠乏性貧血	D50	b-0301
c-0302	その他の貧血	D51-D64	b-0301
c-0303	出血性の病態並びにその他の血液及び造血器の疾患	D65-D77	b-0302
c-0304	免疫機構の障害	D80-D89	b-0302
c-0400	内分泌，栄養及び代謝疾患	E00-E90	b-0400
c-0401	甲状腺中毒症	E05	b-0401
c-0402	甲状腺炎	E06	b-0401
c-0403	その他の甲状腺障害	E00-E04,E07	b-0401
c-0404	インスリン依存性糖尿病	E10	b-0402
c-0405	インスリン非依存性糖尿病	E11	b-0402
c-0406	その他の糖尿病	E12-E14	b-0402
c-0407	卵巣機能障害	E28	b-0403
c-0408	栄養失調（症）及びビタミン欠乏症	E40-E46,E50-E56	b-0403
c-0409	肥満（症）	E66	b-0403
c-0410	高脂血症	E78.0-E78.5	b-0403
c-0411	体液量減少（症）	E86	b-0403
c-0412	その他の内分泌，栄養及び代謝疾患	E00-E90の残り	b-0403
c-0500	精神及び行動の障害	F00-F99	b-0500
c-0501	血管性及び詳細不明の認知症	F01,F03	b-0501
c-0502	アルコール使用＜飲酒＞による精神及び行動の障害	F10	b-0502
c-0503	その他の精神作用物質使用による精神及び行動の障害	F11-F19	b-0502
c-0504	統合失調症，統合失調症型障害及び妄想性障害	F20-F29	b-0503
c-0505	気分［感情］障害（躁うつ病を含む）	F30-F39	b-0504
c-0506	神経症性障害，ストレス関連障害及び身体表現性障害	F40-F48	b-0505
c-0507	知的障害＜精神遅滞＞	F70-F79	b-0506
c-0508	その他の精神及び行動の障害	F00-F99の残り	b-0507
c-0600	神経系の疾患	G00-G99	b-0600
c-0601	髄膜炎	G00-G03	b-0606
c-0602	中枢神経系の炎症性疾患	G04-G09	b-0606
c-0603	脊髄性筋萎縮症及び関連症候群	G12	b-0606
c-0604	パーキンソン病	G20	b-0601
c-0605	アルツハイマー病	G30	b-0602
c-0606	多発性硬化症	G35	b-0606
c-0607	てんかん	G40-G41	b-0603
c-0608	片頭痛及びその他の頭痛症候群	G43-G44	b-0606
c-0609	一過性脳虚血発作及び関連症候群	G45	b-0606
c-0610	睡眠障害	G47	b-0606
c-0611	神経，神経根及び神経そうの障害	G50-G64	b-0606
c-0612	脳性麻痺及びその他の麻痺性症候群	G80-G83	b-0604
c-0613	自律神経系の障害	G90	b-0605
c-0614	その他の神経系の疾患	G00-G99の残り	b-0606
c-0700	眼及び付属器の疾患	H00-H59	b-0700
c-0701	麦粒腫及びさん粒腫	H00	b-0704
c-0702	涙器の障害	H04	b-0704
c-0703	結膜炎	H10	b-0701
c-0704	角膜炎	H16	b-0704
c-0705	白内障	H25-H26	b-0702
c-0706	網膜剥離及び裂孔	H33	b-0704
c-0707	網膜血管閉塞症	H34	b-0704
c-0708	緑内障	H40-H42	b-0704
c-0709	斜視	H49-H50	b-0704
c-0710	屈折及び調節の障害	H52	b-0703
c-0711	盲＜失明＞及び低視力	H54	b-0704
c-0712	その他の眼及び付属器の疾患	H00-H59の残り	b-0704
c-0800	耳及び乳様突起の疾患	H60-H95	b-0800
c-0801	外耳炎	H60	b-0801
c-0802	耳垢栓塞	H61.2	b-0802
c-0803	その他の外耳疾患	H61.0-H61.1, H61.3-H62	b-0802
c-0804	中耳炎	H65-H67	b-0803
c-0805	耳管炎	H68.0	b-0804
c-0806	耳管閉塞	H68.1	b-0804
c-0807	中耳真珠腫	H71	b-0804
c-0808	その他の中耳及び乳様突起の疾患	H69-H70,H72-H75	b-0804
c-0809	メニエール病	H81.0	b-0805
c-0810	中枢性めまい	H81.4	b-0806
c-0811	その他の内耳疾患	H80,H81.1-H81.3,H81.8-H81.9,H82-H83	b-0806
c-0812	難聴	H90-H91	b-0807
c-0813	その他の耳疾患	H92-H95	b-0807
c-0900	循環器系の疾患	I00-I99	b-0900
c-0901	本態性（原発性）高血圧（症）	I10	b-0901
c-0902	高血圧性心疾患	I11	b-0901
c-0903	高血圧性腎疾患	I12	b-0901
c-0904	高血圧性心腎疾患	I13	b-0901
c-0905	二次性高血圧症	I15	b-0901
c-0906	狭心症	I20	b-0902
c-0907	急性心筋梗塞	I21-I22	b-0902
c-0908	冠動脈硬化症	I25.0-I25.1	b-0902
c-0909	陳旧性心筋梗塞	I25.2	b-0902
c-0910	その他の虚血性心疾患	I23-I24,I25.3-I25.9	b-0902
c-0911	慢性リウマチ性心疾患	I05-I09	b-0903
c-0912	慢性非リウマチ性心内膜疾患	I34-I39	b-0903
c-0913	心筋症	I42-I43	b-0903
c-0914	不整脈及び伝導障害	I44-I49	b-0903
c-0915	心不全	I50	b-0903
c-0916	その他の心疾患	I01-I02.0, I27,I30-I33,I40-I41,I51-I52	b-0903
c-0917	くも膜下出血	I60,I69.0	b-0904
c-0918	脳内出血	I61,I69.1	b-0905
c-0919	脳梗塞	I63,I69.3	b-0906
c-0920	脳動脈硬化（症）	I67.2	b-0907
c-0921	その他の脳血管疾患	I62,I64-I67.1, I67.3-I68,I69.2, I69.4-I69.8	b-0908
c-0922	肺塞栓症	I26	b-0912
c-0923	動脈硬化（症）	I70	b-0909
c-0924	大動脈瘤及び解離	I71	b-0912
c-0925	レイノー症候群	I73.0	b-0912
c-0926	動脈の塞栓症及び血栓症	I74	b-0912
c-0927	その他の動脈，細動脈及び毛細血管の疾患	I72,I77-I79	b-0912
c-0928	静脈炎，血栓（性）静脈炎並びに静脈の塞栓症及び血栓症	I80-I82	b-0912
c-0929	下肢の静脈瘤	I83	b-0912
c-0930	痔核	I84	b-0910
c-0931	食道静脈瘤	I85	b-0912
c-0932	低血圧（症）	I95	b-0911
c-0933	その他の循環器系の疾患	I00-I99の残り	b-0912
c-1000	呼吸器系の疾患	J00-J99	b-1000
c-1001	急性鼻咽頭炎［かぜ］＜感冒＞	J00	b-1001
c-1002	急性副鼻腔炎	J01	b-1003
c-1003	急性咽頭炎及び急性扁桃炎	J02-J03	b-1002
c-1004	急性喉頭炎及び気管炎	J04	b-1003
c-1005	その他の急性上気道感染症	J05-J06	b-1003
c-1006	インフルエンザ	J10-J11	b-1011
c-1007	肺炎	J12-J18	b-1004
c-1008	急性気管支炎	J20	b-1005
c-1009	急性細気管支炎	J21	b-1005
c-1010	アレルギ－性鼻炎	J30	b-1006
c-1011	慢性副鼻腔炎	J32	b-1007
c-1012	その他の鼻及び副鼻腔の疾患	J31,J33-J34	b-1011
c-1013	扁桃及びアデノイドの慢性疾患	J35	b-1011
c-1014	その他の上気道の疾患	J36-J39	b-1011
c-1015	急性又は慢性と明示されない気管支炎	J40	b-1008
c-1016	慢性閉塞性肺疾患	J41-J44	b-1009
c-1017	喘息	J45-J46	b-1010
c-1018	気管支拡張症	J47	b-1011
c-1019	じん肺（症）	J60-J65	b-1011
c-1020	間質性肺疾患	J80-J84	b-1011
c-1021	気胸	J93	b-1011
c-1022	その他の呼吸器系の疾患	J00-J99の残り	b-1011
c-1100	消化器系の疾患	K00-K93	b-1100
c-1101	う蝕	K02	b-1101
c-1102	歯肉炎及び歯周疾患	K05	b-1102
c-1103	その他の歯及び歯の支持組織の障害	K00-K01,K03-K04,K06-K08	b-1103
c-1104	口内炎及び関連疾患	K12	b-1112
c-1105	その他の口腔，唾液腺及び顎の疾患	K09-K11,K13-K14	b-1112
c-1106	胃潰瘍	K25	b-1104
c-1107	十二指腸潰瘍	K26	b-1104
c-1108	部位不明の消化性潰瘍	K27	b-1104
c-1109	胃炎及び十二指腸炎	K29	b-1105
c-1110	その他の食道，胃及び十二指腸の疾患	K20-K23,K28,K30-K31	b-1112
c-1111	虫垂の疾患	K35-K38	b-1112
c-1112	鼡径ヘルニア	K40	b-1112
c-1113	その他のヘルニア	K41-K46	b-1112
c-1114	クローン病	K50	b-1112
c-1115	潰瘍性大腸炎	K51	b-1112
c-1116	腸閉塞	K56	b-1112
c-1117	過敏性腸症候群	K58	b-1112
c-1118	便秘	K59.0	b-1112
c-1119	裂肛及び痔瘻	K60	b-1112
c-1120	その他の胃腸の疾患	K52,K55,K57,K59.1-K59.9,K61-K63	b-1112
c-1121	腹膜の疾患	K65-K67	b-1112
c-1122	アルコール性肝疾患	K70	b-1106
c-1123	慢性肝炎（アルコール性のものを除く）	K73	b-1107
c-1124	肝硬変（アルコール性のものを除く）	K74.3-K74.6	b-1108
c-1125	その他の肝疾患	K71-K72,K74.0-K74.2,K75-K77	b-1109
c-1126	胆石症	K80	b-1110
c-1127	胆のう炎	K81	b-1110
c-1128	急性膵炎	K85	b-1111
c-1129	慢性膵炎	K86.0-K86.1	b-1111
c-1130	その他の膵疾患	K86.2-K86.9	b-1111
c-1131	その他の消化器系の疾患	K82-K83,K87-K93	b-1112
c-1200	皮膚及び皮下組織の疾患	L00-L99	b-1200
c-1201	皮膚及び皮下組織の感染症	L00-L08	b-1201
c-1202	アトピ－性皮膚炎	L20	b-1202
c-1203	接触皮膚炎	L21-L25	b-1202
c-1204	その他の皮膚炎及び湿疹	L26-L30	b-1202
c-1205	乾せん及びその他の丘疹落せつ性障害	L40-L45	b-1203
c-1206	じんま疹	L50	b-1203
c-1207	爪の障害	L60-L62	b-1203
c-1208	脱毛症	L63-L65	b-1203
c-1209	ざ瘡＜アクネ＞	L70	b-1203
c-1210	色素異常症	L80-L81	b-1203
c-1211	うおのめ及びべんち	L84	b-1203
c-1212	その他の皮膚及び皮下組織の疾患	L00-L99の残り	b-1203
c-1300	筋骨格系及び結合組織の疾患	M00-M99	b-1300
c-1301	関節リウマチ	M05-M06	b-1301
c-1302	痛風	M10	b-1301
c-1303	その他の炎症性多発性関節障害	M07-M09,M11-M14	b-1301
c-1304	関節症	M15-M19	b-1302
c-1305	四肢の後天性変形	M20-M21	b-1310
c-1306	膝内障	M23	b-1310
c-1307	関節痛	M25.5	b-1310
c-1308	その他の関節障害	M00-M03,M22,M24-M25.4,M25.6-M25.9	b-1310
c-1309	全身性エリテマトーデス＜ＳＬＥ＞	M32	b-1310
c-1310	乾燥症候群［シェーグレン症候群］	M35.0	b-1310
c-1311	ベーチェット病	M35.2	b-1310
c-1312	その他の全身性結合組織障害	M30-M31,M33-M34, M35.1,M35.3-M36	b-1310
c-1313	脊椎障害（脊椎症を含む）	M45-M49	b-1303
c-1314	椎間板障害	M50-M51	b-1304
c-1315	頸腕症候群	M53.1	b-1305
c-1316	腰痛症及び坐骨神経痛	M54.3-M54.5	b-1306
c-1317	その他の背部痛	M54.6-M54.9	b-1307
c-1318	その他の脊柱障害	M40-M43,M53.0, M53.2-M53.9, M54.0-M54.2	b-1307
c-1319	軟部組織障害	M60-M73,M76-M79	b-1310
c-1320	肩の傷害＜損傷＞	M75	b-1308
c-1321	骨粗しょう症	M80-M82	b-1309
c-1322	その他の骨の密度及び構造の障害	M83-M85	b-1309
c-1323	骨髄炎	M86	b-1310
c-1324	若年性骨軟骨症＜骨端症＞	M91-M92	b-1310
c-1325	その他の筋骨格系及び結合組織の疾患	M87-M90,M93-M99	b-1310
c-1400	腎尿路生殖器系の疾患	N00-N99	b-1400
c-1401	急性及び急速進行性腎炎症候群	N00-N01	b-1401
c-1402	ネフローゼ症候群	N04	b-1401
c-1403	その他の糸球体疾患	N02-N03,N05-N08	b-1401
c-1404	腎尿細管間質性疾患	N10-N16	b-1401
c-1405	慢性腎不全	N18	b-1402
c-1406	その他の腎不全	N17,N19	b-1402
c-1407	尿路結石症	N20-N23	b-1403
c-1408	膀胱炎	N30	b-1404
c-1409	その他の腎尿路系の疾患	N25-N29,N31-N39, N99.0-N99.1, N99.4-N99.9	b-1404
c-1410	前立腺肥大（症）	N40	b-1405
c-1411	その他の男性生殖器の疾患	N41-N51	b-1406
c-1412	乳房の障害	N60-N64	b-1408
c-1413	卵管炎及び卵巣炎	N70	b-1408
c-1414	子宮頸（部）の炎症性疾患	N72	b-1408
c-1415	その他の女性骨盤臓器の炎症性疾患	N71,N73-N77	b-1408
c-1416	子宮内膜症	N80	b-1408
c-1417	女性性器脱	N81	b-1408
c-1418	卵巣，卵管及び子宮広間膜の非炎症性障害	N83	b-1408
c-1419	月経障害	N91-N92, N94.0, N94.3-N94.9	b-1407
c-1420	閉経期及びその他の閉経周辺期障害	N95	b-1407
c-1421	女性不妊症	N97	b-1408
c-1422	その他の女性生殖器の疾患	N82,N84-N90,N93, N94.1-N94.2,N96, N98,N99.2-N99.3	b-1408
c-1500	妊娠，分娩及び産じょく	O00-O99	b-1500
c-1501	自然流産	O03	b-1501
c-1502	医学的人工流産	O04	b-1501
c-1503	その他の流産	O00-O02,O05-O08	b-1501
c-1504	妊娠高血圧症候群	O10-O16	b-1502
c-1505	妊娠早期の出血（切迫流産を含む）	O20	b-1504
c-1506	前置胎盤，胎盤早期剥離及び分娩前出血	O44-O46	b-1504
c-1507	その他の胎児及び羊膜腔に関連する母体のケア並びに予想される分娩の諸問題	O30-O43,O47-O48	b-1504
c-1508	早産	O60	b-1504
c-1509	分娩後出血	O72	b-1504
c-1510	単胎自然分娩	O80	b-1503
c-1511	その他の妊娠及び分娩の障害及び合併症	O21-O29,O61-O71, O73-O75,O81-O84	b-1504
c-1512	主として産じょくに関連する合併症及びその他の産科的病態，他に分類されないもの	O85-O99	b-1504
c-1600	周産期に発生した病態	P00-P96	b-1600
c-1601	妊娠期間及び胎児発育に関連する障害	P05-P08	b-1601
c-1602	出産外傷	P10-P15	b-1602
c-1603	周産期に特異的な呼吸障害及び心血管障害	P20-P29	b-1602
c-1604	周産期に特異的な感染症	P35-P39	b-1602
c-1605	胎児及び新生児の出血性障害及び血液障害	P50-P61	b-1602
c-1606	その他の周産期に発生した病態	P00-P96の残り	b-1602
c-1700	先天奇形，変形及び染色体異常	Q00-Q99	b-1700
c-1701	二分脊椎＜脊椎披裂＞	Q05	b-1702
c-1702	その他の神経系の先天奇形	Q00-Q04,Q06-Q07	b-1702
c-1703	心臓の先天奇形	Q20-Q24	b-1701
c-1704	その他の循環器系の先天奇形	Q25-Q28	b-1702
c-1705	唇裂及び口蓋裂	Q35-Q37	b-1702
c-1706	小腸の先天欠損，閉鎖及び狭窄	Q41	b-1702
c-1707	その他の消化器系の先天奇形	Q38-Q40,Q42-Q45	b-1702
c-1708	停留精巣＜睾丸＞	Q53	b-1702
c-1709	その他の腎尿路生殖器系の先天奇形	Q50-Q52,Q54-Q64	b-1702
c-1710	股関節部の先天変形	Q65	b-1702
c-1711	足の先天変形	Q66	b-1702
c-1712	脊柱及び骨性胸郭の先天奇形	Q76	b-1702
c-1713	その他の筋骨格系の先天奇形及び変形	Q67-Q75,Q77-Q79	b-1702
c-1714	その他の先天奇形	Q10-Q18,Q30-Q34,Q80-Q89	b-1702
c-1715	染色体異常, 他に分類されないもの	Q90-Q99	b-1702
c-1800	症状，徴候及び異常臨床所見・異常検査所見で他に分類されないもの	R00-R99	b-1800
c-1801	腹痛及び骨盤痛	R10	b-1800
c-1802	めまい	R42	b-1800
c-1803	不明熱	R50	b-1800
c-1804	頭痛	R51	b-1800
c-1805	老衰	R54	b-1800
c-1806	その他の症状，徴候及び異常臨床所見・異常検査所見で他に分類されないもの	R00-R99の残り	b-1800
c-1900	損傷，中毒及びその他の外因の影響	S00-T98	b-1900
c-1901	頭蓋骨及び顔面骨の骨折	S02	b-1901
c-1902	頸部，胸部及び骨盤の骨折（脊椎を含む）	S12,S22,S32,T08	b-1901
c-1903	大腿骨の骨折	S72	b-1901
c-1904	その他の四肢の骨折	S42,S52,S62,S82,S92,T10,T12	b-1901
c-1905	多部位の骨折	T02	b-1901
c-1906	明示された部位及び多部位の脱臼，捻挫及びストレイン	S03,S13,S23,S33,S43,S53,S63,S73,S83,S93,T03	b-1905
c-1907	眼球及び眼窩の損傷	S05	b-1905
c-1908	頭蓋内損傷	S06	b-1902
c-1909	その他の内臓の損傷	S26-S27,S36-S37	b-1902
c-1910	明示された部位及び多部位の挫滅損傷及び外傷性切断	S07-S08,S17-S18, S28,S38,S47-S48, S57-S58,S67-S68, S77-S78,S87-S88, S97-S98,T04-T05	b-1905
c-1911	その他の明示された部位，部位不明及び多部位の損傷	S00-S01,S04,S09-S11,S14-S16,S19-S21,S24-S25,S29-S31,S34-S35,S39-S41,S44-S46,S49-S51,S54-S56,S59-S61,S64-S66,S69-S71,S74-S76,S79-S81,S84-S86,S89-S91,S94-S96,S99, T00-T01,T06-T07,T09,T11,T13-T14	b-1905
c-1912	自然開口部からの異物侵入の作用	T15-T19	b-1905
c-1913	熱傷及び腐食	T20-T32	b-1903
c-1914	薬物，薬剤及び生物学的製剤による中毒	T36-T50	b-1904
c-1915	薬用を主としない物質の毒作用	T51-T65	b-1904
c-1916	虐待症候群	T74	b-1905
c-1917	その他及び詳細不明の外因の作用	T33-T35,T66-T73,T75-T78	b-1905
c-1918	外傷の早期合併症並びに外科的及び内科的ケアの合併症，他に分類されないもの	T79-T88	b-1905
c-1919	損傷，中毒及びその他の外因による影響の続発・後遺症	T90-T98	b-1905
c-2100	健康状態に影響を及ぼす要因及び保健サービスの利用	Z00-Z99	b-2100
c-2101	検査及び診査のための保健サービスの利用者	Z00-Z13	b-2101
c-2102	無症候性ヒト免疫不全ウイルス［ＨＩＶ］感染状態	Z21	b-2106
c-2103	予防接種	Z23-Z27	b-2102
c-2104	伝染病に関連する健康障害をきたす恐れのあるその他の者	Z20,Z22,Z28-Z29	b-2106
c-2105	避妊管理	Z30	b-2103
c-2106	分娩前スクリーニング及びその他の妊娠の管理	Z34-Z36	b-2103
c-2107	その他の生殖に関連する環境下での保健サービスの利用者	Z31-Z33,Z37-Z38	b-2103
c-2108	分娩後のケア及び検査	Z39	b-2103
c-2109	歯の補てつ	Z46.3-Z46.4	b-2104
c-2110	特定の処置（歯の補てつを除く）及び保健ケアのための保健サービスの利用者	Z40-Z46.2,Z46.5-Z54	b-2105
c-2111	腎透析依存	Z99.2	b-2106
c-2112	その他の理由による保健サービスの利用者	Z55-Z99.1,Z99.3-Z99.9	b-2106
c-2200	特殊目的用コード	Ｕ00－Ｕ99	b-2200
c-2210	重症急性呼吸器症候群［ＳＡＲＳ］	Ｕ04	b-2210
c-2220	その他の特殊目的用コード	Ｕ00－Ｕ99の残り	b-2220
