# Supplementary material for: Analysis of 2897 hospitalization events for patients with chronic kidney disease: results from CKD-JAC study
Source: Clin Exp Nephrol. 2019 Apr 9;23(7):956–68. doi: 10.1007/s10157-019-01730-9 (PMC6555784; doi:10.1007/s10157-019-01730-9)
Supplement: Supplementary file 3 — Supplementary material 3 (XLSX 27 KB) [file 10157_2019_1730_MOESM3_ESM.xlsx]

## Sheet: Sheet1
	Analysis of 2897 hospitalization events for patients with chronic kidney disease: Results from CKD-JAC study, Clinical and Experimental Nephrology, Iimuro et al.
	Supplementary Table 1 Classification of Diseases for Hospitalization
	1b) Relationship between MHLW Disease Classifications (major classifications and sub-classifications) and ICD10 Codes
	Classification of Diseases by Ministry of Health, Labour and Welfare of Japan			International Statistical Classification of Disease and Related Health Problems 10th Revision Version for 2003
	Major code	Title	Minor code
	a-0100	Certain infectious and parasitic diseases	c-0100	A00-B99
	a-0101	Intestinal infectious diseases	c-0101	A00-A08
			c-0102	A09
	a-0102	Tuberculosis	c-0103	A15-A16
			c-0104	A17-A19
	a-0103	Viral infections characterized by skin and mucous membrane lesions	c-0111	B00
			c-0112	B01
			c-0113	B02
			c-0114	B05
			c-0115	B06
			c-0116	B03-B04,B07-B09
	a-0104	Mycoses	c-0123	B35
			c-0124	B37
			c-0125	B36,B38-B49
	a-0105	Other infectious or parasitic diseases	c-0108	A50-A53
			c-0109	A54
			c-0110	A55-A64
			c-0117	B16-B17.0,B18.0-B18.1
			c-0118	B17.1,B18.2
			c-0119	residual codes among B15-B19
			c-0120	B20-B24
			c-0121	B26
			c-0122	A80-A99,B25,B27-B34
			c-0126	B90
			c-0127	B91-B94
			c-0105	A37
			c-0106	A40-A41
			c-0107	A20-A36,A38-A39,A42-A49
			c-0128	residual codes among A00-B99
	a-0200	Neoplasms	c-0200	C00-D48
	a-0201	Malignant neoplasm of stomach	c-0203	C16
	a-0202	Malignant neoplasm of colon, rectosigmoid junction and rectum	c-0204	C18
			c-0205	C19-C20
	a-0203	Malignant neoplasm of trachea, bronchus and lung	c-0212	C33-C34
	a-0204	Other malignant neoplasm	c-0207	C22
			c-0218	C50
			c-0219	C53
			c-0220	C54
			c-0221	C55
			c-0232	C81
			c-0233	C82-C85
			c-0234	C91-C95
			c-0201	C00-C14
			c-0202	C15
			c-0206	C21
			c-0208	C23-C24
			c-0209	C25
			c-0210	C17,C26
			c-0211	C32
			c-0213	C30-C31,C37-C39
			c-0214	C40-C41
			c-0215	C43
			c-0216	C44
			c-0217	C45-C49
			c-0222	C56
			c-0223	C51-C52,C57-C58
			c-0224	C61
			c-0225	C60,C62-C63
			c-0226	C64-C65
			c-0227	C67
			c-0228	C66,C68
			c-0229	C69
			c-0230	C70-C72,C75.1-C75.3
			c-0231	C73
			c-0235	C88-C90,C96
			c-0236	residual codes among C00-C97
	a-0205	In situ neoplasms / Benign neoplasms / Neoplasms of uncertain or unknown behaviour	c-0237	D06
			c-0238	D00-D05,D07-D09
			c-0239	D22-D23
			c-0240	D24
			c-0241	D25
			c-0242	D27
			c-0243	D30
			c-0244	D32-D33,D35.2-D35.4,D42-D43,D44.3-D44.5
			c-0245	residual codes among D00-D48
	a-0300	Diseases of the blood and blood-forming organs and certain disorders involving the immune mechanism	c-0300	D50-D89
	a-0301	Nutritional anaemias / Haemolytic anaemias / Aplastic and other anaemias	c-0301	D50
			c-0302	D51-D64
	a-0302	Coagulation defects, purpura and other haemorrhagic conditions / Other diseases of blood and blood-forming organs / Certain disorders involving the immune mechanism	c-0303	D65-D77
			c-0304	D80-D89
	a-0400	Endocrine, nutritional and metabolic diseases	c-0400	E00-E90
	a-0401	Disorders of thyroid gland	c-0401	E05
			c-0402	E06
			c-0403	E00-E04,E07
	a-0402	Diabetes mellitus	c-0404	E10
			c-0405	E11
			c-0406	E12-E14
	a-0403	Other disorders of glucose regulation and pancreatic internal secretion	c-0407	E28
			c-0408	E40-E46,E50-E56
			c-0409	E66
			c-0410	E78.0-E78.5
			c-0411	E86
			c-0412	residual codes among E00-E90
	a-0500	Mental and behavioural disorders	c-0500	F00-F99
	a-0501	Schizophrenia, schizotypal and delusional disorders	c-0504	F20-F29
	a-0502	Mood [affective] disorders	c-0505	F30-F39
	a-0503	Neurotic, stress-related and somatoform disorders	c-0506	F40-F48
	a-0504	Other mental or behavioural disorders	c-0501	F01,F03
			c-0502	F10
			c-0503	F11-F19
			c-0507	F70-F79
			c-0508	residual codes among F00-F99
	a-0600	Diseases of the nervous system	c-0600	G00-G99
			c-0604	G20
			c-0605	G30
			c-0607	G40-G41
			c-0612	G80-G83
			c-0613	G90
			c-0601	G00-G03
			c-0602	G04-G09
			c-0603	G12
			c-0606	G35
			c-0608	G43-G44
			c-0609	G45
			c-0610	G47
			c-0611	G50-G64
			c-0614	residual codes among G00-G99
	a-0700	Diseases of the eye and adnexa	c-0700	H00-H59
	a-0701	Cataract	c-0705	H25-H26
	a-0702	Other disease of the eye or adnexa	c-0703	H10
			c-0710	H52
			c-0701	H00
			c-0702	H04
			c-0704	H16
			c-0706	H33
			c-0707	H34
			c-0708	H40-H42
			c-0709	H49-H50
			c-0711	H54
			c-0712	residual codes among H00-H59
	a-0800	Diseases of the ear and mastoid process	c-0800	H60-H95
	a-0801	Diseases of external ear	c-0801	H60
			c-0802	H61.2
			c-0803	H61.0-H61.1, H61.3-H62
	a-0802	Diseases of middle ear and mastoid	c-0804	H65-H67
	a-0803	Other diseases of middle ear and mastoid	c-0805	H68.0
			c-0806	H68.1
			c-0807	H71
			c-0808	H69-H70,H72-H75
	a-0804	Diseases of inner ear	c-0809	H81.0
			c-0810	H81.4
			c-0811	H80,H81.1-H81.3,H81.8-H81.9,H82-H83
	a-0805	Other disease of the ear	c-0812	H90-H91
			c-0813	H92-H95
	a-0900	Diseases of the circulatory system	c-0900	I00-I99
	a-0901	Hypertensive diseases	c-0901	I10
			c-0902	I11
			c-0903	I12
			c-0904	I13
			c-0905	I15
	a-0902	Ischaemic heart diseases	c-0906	I20
			c-0907	I21-I22
			c-0908	I25.0-I25.1
			c-0909	I25.2
			c-0910	I23-I24,I25.3-I25.9
	a-0903	Other heart diseases	c-0911	I05-I09
			c-0912	I34-I39
			c-0913	I42-I43
			c-0914	I44-I49
			c-0915	I50
			c-0916	I01-I02.0, I27,I30-I33,I40-I41,I51-I52
	a-0904	Cerebral infarction	c-0919	I63,I69.3
	a-0905	Other cerebrovascular diseases	c-0917	I60,I69.0
			c-0918	I61,I69.1
			c-0920	I67.2
			c-0921	I62,I64-I67.1, I67.3-I68,I69.2, I69.4-I69.8
	a-0906	Other diseases of the circulatory system	c-0923	I70
			c-0930	I84
			c-0932	I95
			c-0922	I26
			c-0924	I71
			c-0925	I73.0
			c-0926	I74
			c-0927	I72,I77-I79
			c-0928	I80-I82
			c-0929	I83
			c-0931	I85
			c-0933	residual codes among I00-I99
	a-1000	Diseases of the respiratory system	c-1000	J00-J99
	a-1001	Acute upper respiratory infections	c-1001	J00
			c-1003	J02-J03
			c-1002	J01
			c-1004	J04
			c-1005	J05-J06
	a-1002	Viral pneumonia	c-1007	J12-J18
	a-1003	Acute bronchiolitis	c-1008	J20
			c-1009	J21
	a-1004	Bronchitis	c-1015	J40
			c-1016	J41-J44
	a-1005	Asthma	c-1017	J45-J46
	a-1006	Other diseases of the respiratory system	c-1010	J30
			c-1011	J32
			c-1006	J10-J11
			c-1012	J31,J33-J34
			c-1013	J35
			c-1014	J36-J39
			c-1018	J47
			c-1019	J60-J65
			c-1020	J80-J84
			c-1021	J93
			c-1022	residual codes among J00-J99
	a-1100	Diseases of the digestive system	c-1100	K00-K93
	a-1101	Dental caries	c-1101	K02
	a-1102	Gingivitis and periodontal diseases	c-1102	K05
	a-1103	Other dental, gingivitis or periodontal diseases	c-1103	K00-K01,K03-K04,K06-K08
	a-1104	Gastric ulcer / Duodenal ulcer / Peptic ulcer, site unspecified	c-1106	K25
			c-1107	K26
			c-1108	K27
	a-1105	Gastritis and duodenitis	c-1109	K29
	a-1106	Diseases of liver	c-1122	K70
			c-1123	K73
			c-1124	K74.3-K74.6
			c-1125	K71-K72,K74.0-K74.2,K75-K77
	a-1107	Other diseases of the digestive system	c-1126	K80
			c-1127	K81
			c-1128	K85
			c-1129	K86.0-K86.1
			c-1130	K86.2-K86.9
			c-1104	K12
			c-1105	K09-K11,K13-K14
			c-1110	K20-K23,K28,K30-K31
			c-1111	K35-K38
			c-1112	K40
			c-1113	K41-K46
			c-1114	K50
			c-1115	K51
			c-1116	K56
			c-1117	K58
			c-1118	K59.0
			c-1119	K60
			c-1120	K52,K55,K57,K59.1-K59.9,K61-K63
			c-1121	K65-K67
			c-1131	K82-K83,K87-K93
	a-1200	Diseases of the skin and subcutaneous tissue	c-1200	L00-L99
			c-1201	L00-L08
			c-1202	L20
			c-1203	L21-L25
			c-1204	L26-L30
			c-1205	L40-L45
			c-1206	L50
			c-1207	L60-L62
			c-1208	L63-L65
			c-1209	L70
			c-1210	L80-L81
			c-1211	L84
			c-1212	residual codes among L00-L99
	a-1300	Diseases of the musculoskeletal system and connective tissue	c-1300	M00-M99
	a-1301	Inflammatory polyarthropathies	c-1301	M05-M06
			c-1302	M10
			c-1303	M07-M09,M11-M14
	a-1302	Dorsopathies	c-1313	M45-M49
			c-1314	M50-M51
			c-1315	M53.1
			c-1316	M54.3-M54.5
			c-1317	M54.6-M54.9
			c-1318	M40-M43,M53.0, M53.2-M53.9, M54.0-M54.2
	a-1303	Disorders of bone density and structure	c-1321	M80-M82
			c-1322	M83-M85
	a-1304	Other diseases of the musculoskeletal system or connective tissue	c-1304	M15-M19
			c-1320	M75
			c-1305	M20-M21
			c-1306	M23
			c-1307	M25.5
			c-1308	M00-M03,M22,M24-M25.4,M25.6-M25.9
			c-1309	M32
			c-1310	M35.0
			c-1311	M35.2
			c-1312	M30-M31,M33-M34, M35.1,M35.3-M36
			c-1319	M60-M73,M76-M79
			c-1323	M86
			c-1324	M91-M92
			c-1325	M87-M90,M93-M99
	a-1400	Diseases of the genitourinary system	c-1400	N00-N99
	a-1401	Glomerular diseases / Renal tubulo-interstitial diseases / Renal failure	c-1401	N00-N01
			c-1402	N04
			c-1403	N02-N03,N05-N08
			c-1404	N10-N16
			c-1405	N18
			c-1406	N17,N19
	a-1402	Disorders of breast / Inflammatory diseases of female pelvic organs / Noninflammatory disorders of female genital tract / Postoperative adhesions of vagina / Prolapse of vaginal vault after hysterectomy	c-1419	N91-N92, N94.0, N94.3-N94.9
			c-1420	N95
			c-1412	N60-N64
			c-1413	N70
			c-1414	N72
			c-1415	N71,N73-N77
			c-1416	N80
			c-1417	N81
			c-1418	N83
			c-1421	N97
			c-1422	N82,N84-N90,N93, N94.1-N94.2,N96, N98,N99.2-N99.3
	a-1403	Other diseases of the genitourinary system	c-1407	N20-N23
			c-1408	N30
			c-1409	N25-N29,N31-N39, N99.0-N99.1, N99.4-N99.9
			c-1410	N40
			c-1411	N41-N51
	a-1500	Pregnancy, childbirth and the puerperium	c-1500	O00-O99
	a-1501	Pregnancy with abortive outcome	c-1501	O03
			c-1502	O04
			c-1503	O00-O02,O05-O08
	a-1502	Oedema, proteinuria and hypertensive disorders in pregnancy, childbirth and the puerperium	c-1504	O10-O16
	a-1503	Single spontaneous delivery	c-1510	O80
	a-1504	Other pregnancy, childbirth or the puerperium	c-1505	O20
			c-1506	O44-O46
			c-1507	O30-O43,O47-O48
			c-1508	O60
			c-1509	O72
			c-1511	O21-O29,O61-O71, O73-O75,O81-O84
			c-1512	O85-O99
	a-1600	Certain conditions originating in the perinatal period	c-1600	P00-P96
			c-1601	P05-P08
			c-1602	P10-P15
			c-1603	P20-P29
			c-1604	P35-P39
			c-1605	P50-P61
			c-1606	residual codes among P00-P96
	a-1700	Congenital malformations, deformations and chromosomal abnormalities	c-1700	Q00-Q99
			c-1703	Q20-Q24
			c-1701	Q05
			c-1702	Q00-Q04,Q06-Q07
			c-1704	Q25-Q28
			c-1705	Q35-Q37
			c-1706	Q41
			c-1707	Q38-Q40,Q42-Q45
			c-1708	Q53
			c-1709	Q50-Q52,Q54-Q64
			c-1710	Q65
			c-1711	Q66
			c-1712	Q76
			c-1713	Q67-Q75,Q77-Q79
			c-1714	Q10-Q18,Q30-Q34,Q80-Q89
			c-1715	Q90-Q99
	a-1800	Symptoms, signs and abnormal clinical and laboratory findings, not elsewhere classified	c-1800	R00-R99
			c-1801	R10
			c-1802	R42
			c-1803	R50
			c-1804	R51
			c-1805	R54
			c-1806	residual codes among R00-R99
	a-1900	Injury, poisoning and certain other consequences of external causes	c-1900	S00-T98
	a-1901	Fracture	c-1901	S02
			c-1902	S12,S22,S32,T08
			c-1903	S72
			c-1904	S42,S52,S62,S82,S92,T10,T12
			c-1905	T02
	a-1902	Others	c-1908	S06
			c-1909	S26-S27,S36-S37
			c-1913	T20-T32
			c-1914	T36-T50
			c-1915	T51-T65
			c-1906	S03,S13,S23,S33,S43,S53,S63,S73,S83,S93,T03
			c-1907	S05
			c-1910	S07-S08,S17-S18, S28,S38,S47-S48, S57-S58,S67-S68, S77-S78,S87-S88, S97-S98,T04-T05
			c-1911	S00-S01,S04,S09-S11,S14-S16,S19-S21,S24-S25,S29-S31,S34-S35,S39-S41,S44-S46,S49-S51,S54-S56,S59-S61,S64-S66,S69-S71,S74-S76,S79-S81,S84-S86,S89-S91,S94-S96,S99, T00-T01,T06-T07,T09,T11,T13-T14
			c-1912	T15-T19
			c-1916	T74
			c-1917	T33-T35,T66-T73,T75-T78
			c-1918	T79-T88
			c-1919	T90-T98
	a-2100	Factors influencing health status and contact with health services	c-2100	Z00-Z99
	a-2101	Persons encountering health services in circumstances related to reproduction	c-2105	Z30
			c-2106	Z34-Z36
			c-2107	Z31-Z33,Z37-Z38
			c-2108	Z39
	a-2102	Fitting and adjustment of dental prosthetic device / Fitting and adjustment of orthodontic device	c-2109	Z46.3-Z46.4
	a-2103	Others	c-2101	Z00-Z13
			c-2103	Z23-Z27
			c-2110	Z40-Z46.2,Z46.5-Z54
			c-2102	Z21
			c-2104	Z20,Z22,Z28-Z29
			c-2111	Z99.2
			c-2112	Z55-Z99.1,Z99.3-Z99.9
	a-2200	Codes for special purposes	c-2200	Ｕ00－Ｕ99
	a-2210	SARS	c-2210	Ｕ04
	a-2220	Others	c-2220	residual codes among Ｕ00－Ｕ99
