# Supplementary material for: Analysis of 2897 hospitalization events for patients with chronic kidney disease: results from CKD-JAC study
Source: Clin Exp Nephrol. 2019 Apr 9;23(7):956–68. doi: 10.1007/s10157-019-01730-9 (PMC6555784; doi:10.1007/s10157-019-01730-9)
Supplement: Supplementary file 4 — Supplementary material 4 (XLSX 29 KB) [file 10157_2019_1730_MOESM4_ESM.xlsx]

## Sheet: supple2
	Analysis of 2897 hospitalization events for patients with chronic kidney disease: Results from CKD-JAC study, Clinical and Experimental Nephrology, Iimuro et al.
	Supplementary Table 1 Classification of Diseases for Hospitalization
	1c) Relationship between CKD-JAC and MHLW Disease Classifications (sub-classifications)
	CKD-JAC classification
	01. Infectious diseases		02. Malignant neoplasm		03. Endocrine, nutritional and metabolic diseases	04. Diseases of the eye and adnexa	05. Diseases of the circulatory system	06. Heart diseases	07. Diseases of the respiratory system	08. Diseases of digestive tract
	c-0100	c-0128	c-0200	c-0225	c-0400	c-0700	c-0901	c-0906	c-0610	c-0930
	c-0101	c-0601	c-0201	c-0226	c-0401	c-0701	c-0902	c-0907	c-1014	c-1104
	c-0102	c-0804	c-0202	c-0227	c-0402	c-0702	c-0903	c-0908	c-1015	c-1105
	c-0103	c-1001	c-0203	c-0228	c-0403	c-0703	c-0904	c-0909	c-1016	c-1106
	c-0104	c-1002	c-0204	c-0229	c-0404	c-0704	c-0905	c-0910	c-1017	c-1107
	c-0105	c-1003	c-0205	c-0230	c-0405	c-0705	c-0917	c-0911	c-1018	c-1108
	c-0106	c-1004	c-0206	c-0231	c-0406	c-0706	c-0918	c-0912	c-1019	c-1109
	c-0107	c-1005	c-0207	c-0232	c-0407	c-0707	c-0919	c-0913	c-1021	c-1110
	c-0108	c-1006	c-0208	c-0233	c-0409	c-0708	c-0920	c-0914	c-1022	c-1113
	c-0109	c-1007	c-0209	c-0234	c-0410	c-0709	c-0921	c-0915		c-1114
	c-0110	c-1008	c-0210	c-0235	c-0412	c-0710	c-0922	c-0916		c-1115
	c-0111	c-1009	c-0211	c-0236	c-1302	c-0711	c-0923			c-1116
	c-0112	c-1011	c-0212		c-1309	c-0712	c-0924			c-1117
	c-0113	c-1013	c-0213		c-1310		c-0925			c-1118
	c-0114	c-1020	c-0214		c-1311		c-0926			c-1119
	c-0115	c-1101	c-0215		c-1312		c-0927			c-1120
	c-0116	c-1102	c-0216				c-0928			c-1121
	c-0120	c-1103	c-0217				c-0929			c-1131
	c-0121	c-1111	c-0218				c-0931
	c-0122	c-1201	c-0219				c-0932
	c-0123	c-1323	c-0220				c-0933
	c-0124	c-1408	c-0221
	c-0125	c-1411	c-0222
	c-0126	c-1803	c-0223
	c-0127		c-0224
	CKD-JAC classification
	09. Hepato-Biliary-Pancreatic diseases	10. Kidney diseases	11. Others 1					12. Others 2
	c-0117	c-1401	c-0611	c-1209	c-1407	c-1512	c-1901	c-0237	c-0602	c-1917
	c-0118	c-1402	c-0800	c-1210	c-1409	c-1600	c-1902	c-0238	c-0603	c-1918
	c-0119	c-1403	c-0801	c-1211	c-1410	c-1601	c-1903	c-0239	c-0604	c-1919
	c-1122	c-1404	c-0802	c-1212	c-1412	c-1602	c-1904	c-0240	c-0605	c-2101
	c-1123	c-1405	c-0803	c-1300	c-1413	c-1603	c-1905	c-0241	c-0606	c-2102
	c-1124	c-1406	c-0805	c-1301	c-1414	c-1604	c-1906	c-0242	c-0607	c-2103
	c-1125		c-0806	c-1303	c-1415	c-1605	c-2109	c-0243	c-0608	c-2104
	c-1126		c-0807	c-1304	c-1416	c-1606		c-0244	c-0609	c-2105
	c-1127		c-0808	c-1305	c-1417	c-1700		c-0245	c-0612	c-2106
	c-1128		c-0809	c-1306	c-1418	c-1701		c-0301	c-0613	c-2107
	c-1129		c-0810	c-1307	c-1419	c-1702		c-0302	c-0614	c-2108
	c-1130		c-0811	c-1308	c-1420	c-1703		c-0303	c-1801	c-2110
			c-0812	c-1313	c-1421	c-1704		c-0304	c-1804	c-2111
			c-0813	c-1314	c-1422	c-1705		c-0408	c-1805	c-2112
			c-1010	c-1315	c-1501	c-1706		c-0411	c-1806	c-2200
			c-1012	c-1316	c-1502	c-1707		c-0500	c-1907	c-2210
			c-1112	c-1317	c-1503	c-1708		c-0501	c-1908	c-2220
			c-1200	c-1318	c-1504	c-1709		c-0502	c-1909
			c-1202	c-1319	c-1505	c-1710		c-0503	c-1910
			c-1203	c-1320	c-1506	c-1711		c-0504	c-1911
			c-1204	c-1321	c-1507	c-1712		c-0505	c-1912
			c-1205	c-1322	c-1508	c-1713		c-0506	c-1913
			c-1206	c-1324	c-1509	c-1714		c-0507	c-1914
			c-1207	c-1325	c-1510	c-1715		c-0508	c-1915
			c-1208	c-1400	c-1511	c-1802		c-0600	c-1916

## Sheet: Sheet
jaccate	coc	namec
	c-0300	血液及び造血器の疾患並びに免疫機構の障害
	c-0900	循環器系の疾患
	c-1000	呼吸器系の疾患
	c-1100	消化器系の疾患
	c-1500	妊娠，分娩及び産じょく
	c-1800	症状，徴候及び異常臨床所見・異常検査所見で他に分類されないもの
	c-1900	損傷，中毒及びその他の外因の影響
	c-2100	健康状態に影響を及ぼす要因及び保健サービスの利用
01.感染症	c-0100	感染症及び寄生虫症
01.感染症	c-0101	原因の明示された腸管感染症
01.感染症	c-0102	感染症と推定される下痢及び胃腸炎
01.感染症	c-0103	呼吸器結核
01.感染症	c-0104	その他の結核
01.感染症	c-0105	百日咳
01.感染症	c-0106	敗血症
01.感染症	c-0107	その他の細菌性疾患
01.感染症	c-0108	梅毒
01.感染症	c-0109	淋菌感染症
01.感染症	c-0110	主として性的伝播様式をとるその他の感染症
01.感染症	c-0111	ヘルペスウイルス感染症
01.感染症	c-0112	水痘
01.感染症	c-0113	帯状疱疹
01.感染症	c-0114	麻疹
01.感染症	c-0115	風疹
01.感染症	c-0116	皮膚及び粘膜の病変を伴うその他のウイルス疾患
01.感染症	c-0120	ヒト免疫不全ウイルス［ＨＩＶ］病
01.感染症	c-0121	ムンプス
01.感染症	c-0122	その他のウイルス疾患
01.感染症	c-0123	皮膚糸状菌症
01.感染症	c-0124	カンジダ症
01.感染症	c-0125	その他の真菌症
01.感染症	c-0126	結核の続発・後遺症
01.感染症	c-0127	その他の感染症及び寄生虫症の続発・後遺症
01.感染症	c-0128	その他の感染症及び寄生虫症
01.感染症	c-0601	髄膜炎
01.感染症	c-0804	中耳炎
01.感染症	c-1001	急性鼻咽頭炎［かぜ］＜感冒＞
01.感染症	c-1002	急性副鼻腔炎
01.感染症	c-1003	急性咽頭炎及び急性扁桃炎
01.感染症	c-1004	急性喉頭炎及び気管炎
01.感染症	c-1005	その他の急性上気道感染症
01.感染症	c-1006	インフルエンザ
01.感染症	c-1007	肺炎
01.感染症	c-1008	急性気管支炎
01.感染症	c-1009	急性細気管支炎
01.感染症	c-1011	慢性副鼻腔炎
01.感染症	c-1013	扁桃及びアデノイドの慢性疾患
01.感染症	c-1020	間質性肺疾患
01.感染症	c-1101	う蝕
01.感染症	c-1102	歯肉炎及び歯周疾患
01.感染症	c-1103	その他の歯及び歯の支持組織の障害
01.感染症	c-1111	虫垂の疾患
01.感染症	c-1201	皮膚及び皮下組織の感染症
01.感染症	c-1323	骨髄炎
01.感染症	c-1408	膀胱炎
01.感染症	c-1411	その他の男性生殖器の疾患	急性前立腺炎の3件
01.感染症	c-1803	不明熱
02.癌	c-0200	新生物
02.癌	c-0201	口唇，口腔及び咽頭の悪性新生物
02.癌	c-0202	食道の悪性新生物
02.癌	c-0203	胃の悪性新生物
02.癌	c-0204	結腸の悪性新生物
02.癌	c-0205	直腸Ｓ状結腸移行部及び直腸の悪性新生物
02.癌	c-0206	肛門及び肛門管の悪性新生物
02.癌	c-0207	肝及び肝内胆管の悪性新生物
02.癌	c-0208	胆のう及びその他の胆道の悪性新生物
02.癌	c-0209	膵の悪性新生物
02.癌	c-0210	その他の消化器の悪性新生物
02.癌	c-0211	喉頭の悪性新生物
02.癌	c-0212	気管，気管支及び肺の悪性新生物
02.癌	c-0213	その他の呼吸器及び胸腔内臓器の悪性新生物
02.癌	c-0214	骨及び関節軟骨の悪性新生物
02.癌	c-0215	皮膚の悪性黒色腫
02.癌	c-0216	その他の皮膚の悪性新生物
02.癌	c-0217	中皮及び軟部組織の悪性新生物
02.癌	c-0218	乳房の悪性新生物
02.癌	c-0219	子宮頸（部）の悪性新生物
02.癌	c-0220	子宮体（部）の悪性新生物
02.癌	c-0221	子宮の部位不明の悪性新生物
02.癌	c-0222	卵巣の悪性新生物
02.癌	c-0223	その他の女性生殖器の悪性新生物
02.癌	c-0224	前立腺の悪性新生物
02.癌	c-0225	その他の男性生殖器の悪性新生物
02.癌	c-0226	腎及び腎盂の悪性新生物
02.癌	c-0227	膀胱の悪性新生物
02.癌	c-0228	その他の尿路の悪性新生物
02.癌	c-0229	眼及び付属器の悪性新生物
02.癌	c-0230	中枢神経系の悪性新生物
02.癌	c-0231	甲状腺の悪性新生物
02.癌	c-0232	ホジキン病
02.癌	c-0233	非ホジキンリンパ腫
02.癌	c-0234	白血病
02.癌	c-0235	その他のリンパ組織，造血組織及び関連組織の悪性新生物
02.癌	c-0236	その他の悪性新生物
03.内分泌	c-0400	内分泌，栄養及び代謝疾患
03.内分泌	c-0401	甲状腺中毒症
03.内分泌	c-0402	甲状腺炎
03.内分泌	c-0403	その他の甲状腺障害
03.内分泌	c-0404	インスリン依存性糖尿病
03.内分泌	c-0405	インスリン非依存性糖尿病
03.内分泌	c-0406	その他の糖尿病
03.内分泌	c-0407	卵巣機能障害
03.内分泌	c-0409	肥満（症）
03.内分泌	c-0410	高脂血症
03.内分泌	c-0412	その他の内分泌，栄養及び代謝疾患
03.内分泌	c-1302	痛風
03.内分泌	c-1309	全身性エリテマトーデス＜ＳＬＥ＞
03.内分泌	c-1310	乾燥症候群［シェーグレン症候群］
03.内分泌	c-1311	ベーチェット病
03.内分泌	c-1312	その他の全身性結合組織障害
04.眼	c-0700	眼及び付属器の疾患
04.眼	c-0701	麦粒腫及びさん粒腫
04.眼	c-0702	涙器の障害
04.眼	c-0703	結膜炎
04.眼	c-0704	角膜炎
04.眼	c-0705	白内障
04.眼	c-0706	網膜剥離及び裂孔
04.眼	c-0707	網膜血管閉塞症
04.眼	c-0708	緑内障
04.眼	c-0709	斜視
04.眼	c-0710	屈折及び調節の障害
04.眼	c-0711	盲＜失明＞及び低視力
04.眼	c-0712	その他の眼及び付属器の疾患
05.血圧・血管	c-0901	本態性（原発性）高血圧（症）
05.血圧・血管	c-0902	高血圧性心疾患
05.血圧・血管	c-0903	高血圧性腎疾患
05.血圧・血管	c-0904	高血圧性心腎疾患
05.血圧・血管	c-0905	二次性高血圧症
05.血圧・血管	c-0917	くも膜下出血
05.血圧・血管	c-0918	脳内出血
05.血圧・血管	c-0919	脳梗塞
05.血圧・血管	c-0920	脳動脈硬化（症）
05.血圧・血管	c-0921	その他の脳血管疾患
05.血圧・血管	c-0922	肺塞栓症
05.血圧・血管	c-0923	動脈硬化（症）
05.血圧・血管	c-0924	大動脈瘤及び解離
05.血圧・血管	c-0925	レイノー症候群
05.血圧・血管	c-0926	動脈の塞栓症及び血栓症
05.血圧・血管	c-0927	その他の動脈，細動脈及び毛細血管の疾患
05.血圧・血管	c-0928	静脈炎，血栓（性）静脈炎並びに静脈の塞栓症及び血栓症
05.血圧・血管	c-0929	下肢の静脈瘤
05.血圧・血管	c-0931	食道静脈瘤
05.血圧・血管	c-0932	低血圧（症）
05.血圧・血管	c-0933	その他の循環器系の疾患
06.心臓	c-0906	狭心症
06.心臓	c-0907	急性心筋梗塞
06.心臓	c-0908	冠動脈硬化症
06.心臓	c-0909	陳旧性心筋梗塞
06.心臓	c-0910	その他の虚血性心疾患
06.心臓	c-0911	慢性リウマチ性心疾患
06.心臓	c-0912	慢性非リウマチ性心内膜疾患
06.心臓	c-0913	心筋症
06.心臓	c-0914	不整脈及び伝導障害
06.心臓	c-0915	心不全
06.心臓	c-0916	その他の心疾患
07.呼吸器	c-0610	睡眠障害	SAS12例存在
07.呼吸器	c-1014	その他の上気道の疾患
07.呼吸器	c-1015	急性又は慢性と明示されない気管支炎
07.呼吸器	c-1016	慢性閉塞性肺疾患
07.呼吸器	c-1017	喘息
07.呼吸器	c-1018	気管支拡張症
07.呼吸器	c-1019	じん肺（症）
07.呼吸器	c-1021	気胸
07.呼吸器	c-1022	その他の呼吸器系の疾患
08.消化管	c-0930	痔核
08.消化管	c-1104	口内炎及び関連疾患
08.消化管	c-1105	その他の口腔，唾液腺及び顎の疾患
08.消化管	c-1106	胃潰瘍
08.消化管	c-1107	十二指腸潰瘍
08.消化管	c-1108	部位不明の消化性潰瘍
08.消化管	c-1109	胃炎及び十二指腸炎
08.消化管	c-1110	その他の食道，胃及び十二指腸の疾患
08.消化管	c-1113	その他のヘルニア
08.消化管	c-1114	クローン病
08.消化管	c-1115	潰瘍性大腸炎
08.消化管	c-1116	腸閉塞
08.消化管	c-1117	過敏性腸症候群
08.消化管	c-1118	便秘
08.消化管	c-1119	裂肛及び痔瘻
08.消化管	c-1120	その他の胃腸の疾患
08.消化管	c-1121	腹膜の疾患
08.消化管	c-1131	その他の消化器系の疾患
09.肝胆膵	c-0117	Ｂ型ウイルス肝炎
09.肝胆膵	c-0118	Ｃ型ウイルス肝炎
09.肝胆膵	c-0119	その他のウイルス肝炎
09.肝胆膵	c-1122	アルコール性肝疾患
09.肝胆膵	c-1123	慢性肝炎（アルコール性のものを除く）
09.肝胆膵	c-1124	肝硬変（アルコール性のものを除く）
09.肝胆膵	c-1125	その他の肝疾患
09.肝胆膵	c-1126	胆石症
09.肝胆膵	c-1127	胆のう炎
09.肝胆膵	c-1128	急性膵炎
09.肝胆膵	c-1129	慢性膵炎
09.肝胆膵	c-1130	その他の膵疾患
10.腎臓	c-1401	急性及び急速進行性腎炎症候群
10.腎臓	c-1402	ネフローゼ症候群
10.腎臓	c-1403	その他の糸球体疾患
10.腎臓	c-1404	腎尿細管間質性疾患
10.腎臓	c-1405	慢性腎不全
10.腎臓	c-1406	その他の腎不全
11.マイナー	c-0611	神経，神経根及び神経そうの障害
11.マイナー	c-0800	耳及び乳様突起の疾患
11.マイナー	c-0801	外耳炎
11.マイナー	c-0802	耳垢栓塞
11.マイナー	c-0803	その他の外耳疾患
11.マイナー	c-0805	耳管炎
11.マイナー	c-0806	耳管閉塞
11.マイナー	c-0807	中耳真珠腫
11.マイナー	c-0808	その他の中耳及び乳様突起の疾患
11.マイナー	c-0809	メニエール病
11.マイナー	c-0810	中枢性めまい
11.マイナー	c-0811	その他の内耳疾患
11.マイナー	c-0812	難聴
11.マイナー	c-0813	その他の耳疾患
11.マイナー	c-1010	アレルギ－性鼻炎
11.マイナー	c-1012	その他の鼻及び副鼻腔の疾患
11.マイナー	c-1112	鼡径ヘルニア
11.マイナー	c-1200	皮膚及び皮下組織の疾患
11.マイナー	c-1202	アトピ－性皮膚炎
11.マイナー	c-1203	接触皮膚炎
11.マイナー	c-1204	その他の皮膚炎及び湿疹
11.マイナー	c-1205	乾せん及びその他の丘疹落せつ性障害
11.マイナー	c-1206	じんま疹
11.マイナー	c-1207	爪の障害
11.マイナー	c-1208	脱毛症
11.マイナー	c-1209	ざ瘡＜アクネ＞
11.マイナー	c-1210	色素異常症
11.マイナー	c-1211	うおのめ及びべんち
11.マイナー	c-1212	その他の皮膚及び皮下組織の疾患
11.マイナー	c-1300	筋骨格系及び結合組織の疾患
11.マイナー	c-1301	関節リウマチ
11.マイナー	c-1303	その他の炎症性多発性関節障害
11.マイナー	c-1304	関節症
11.マイナー	c-1305	四肢の後天性変形
11.マイナー	c-1306	膝内障
11.マイナー	c-1307	関節痛
11.マイナー	c-1308	その他の関節障害
11.マイナー	c-1313	脊椎障害（脊椎症を含む）
11.マイナー	c-1314	椎間板障害
11.マイナー	c-1315	頸腕症候群
11.マイナー	c-1316	腰痛症及び坐骨神経痛
11.マイナー	c-1317	その他の背部痛
11.マイナー	c-1318	その他の脊柱障害
11.マイナー	c-1319	軟部組織障害
11.マイナー	c-1320	肩の傷害＜損傷＞
11.マイナー	c-1321	骨粗しょう症
11.マイナー	c-1322	その他の骨の密度及び構造の障害
11.マイナー	c-1324	若年性骨軟骨症＜骨端症＞
11.マイナー	c-1325	その他の筋骨格系及び結合組織の疾患
11.マイナー	c-1400	腎尿路生殖器系の疾患
11.マイナー	c-1407	尿路結石症
11.マイナー	c-1409	その他の腎尿路系の疾患
11.マイナー	c-1410	前立腺肥大（症）
11.マイナー	c-1412	乳房の障害
11.マイナー	c-1413	卵管炎及び卵巣炎
11.マイナー	c-1414	子宮頸（部）の炎症性疾患
11.マイナー	c-1415	その他の女性骨盤臓器の炎症性疾患
11.マイナー	c-1416	子宮内膜症
11.マイナー	c-1417	女性性器脱
11.マイナー	c-1418	卵巣，卵管及び子宮広間膜の非炎症性障害
11.マイナー	c-1419	月経障害
11.マイナー	c-1420	閉経期及びその他の閉経周辺期障害
11.マイナー	c-1421	女性不妊症
11.マイナー	c-1422	その他の女性生殖器の疾患
11.マイナー	c-1501	自然流産
11.マイナー	c-1502	医学的人工流産
11.マイナー	c-1503	その他の流産
11.マイナー	c-1504	妊娠高血圧症候群
11.マイナー	c-1505	妊娠早期の出血（切迫流産を含む）
11.マイナー	c-1506	前置胎盤，胎盤早期剥離及び分娩前出血
11.マイナー	c-1507	その他の胎児及び羊膜腔に関連する母体のケア並びに予想される分娩の諸問題
11.マイナー	c-1508	早産
11.マイナー	c-1509	分娩後出血
11.マイナー	c-1510	単胎自然分娩
11.マイナー	c-1511	その他の妊娠及び分娩の障害及び合併症
11.マイナー	c-1512	主として産じょくに関連する合併症及びその他の産科的病態，他に分類されないもの
11.マイナー	c-1600	周産期に発生した病態
11.マイナー	c-1601	妊娠期間及び胎児発育に関連する障害
11.マイナー	c-1602	出産外傷
11.マイナー	c-1603	周産期に特異的な呼吸障害及び心血管障害
11.マイナー	c-1604	周産期に特異的な感染症
11.マイナー	c-1605	胎児及び新生児の出血性障害及び血液障害
11.マイナー	c-1606	その他の周産期に発生した病態
11.マイナー	c-1700	先天奇形，変形及び染色体異常
11.マイナー	c-1701	二分脊椎＜脊椎披裂＞
11.マイナー	c-1702	その他の神経系の先天奇形
11.マイナー	c-1703	心臓の先天奇形
11.マイナー	c-1704	その他の循環器系の先天奇形
11.マイナー	c-1705	唇裂及び口蓋裂
11.マイナー	c-1706	小腸の先天欠損，閉鎖及び狭窄
11.マイナー	c-1707	その他の消化器系の先天奇形
11.マイナー	c-1708	停留精巣＜睾丸＞
11.マイナー	c-1709	その他の腎尿路生殖器系の先天奇形
11.マイナー	c-1710	股関節部の先天変形
11.マイナー	c-1711	足の先天変形
11.マイナー	c-1712	脊柱及び骨性胸郭の先天奇形
11.マイナー	c-1713	その他の筋骨格系の先天奇形及び変形
11.マイナー	c-1714	その他の先天奇形
11.マイナー	c-1715	染色体異常, 他に分類されないもの
11.マイナー	c-1802	めまい
11.マイナー	c-1901	頭蓋骨及び顔面骨の骨折
11.マイナー	c-1902	頸部，胸部及び骨盤の骨折（脊椎を含む）
11.マイナー	c-1903	大腿骨の骨折
11.マイナー	c-1904	その他の四肢の骨折
11.マイナー	c-1905	多部位の骨折
11.マイナー	c-1906	明示された部位及び多部位の脱臼，捻挫及びストレイン
11.マイナー	c-2109	歯の補てつ
12.その他	c-0237	子宮頸（部）の上皮内癌
12.その他	c-0238	その他の上皮内新生物
12.その他	c-0239	皮膚の良性新生物
12.その他	c-0240	乳房の良性新生物
12.その他	c-0241	子宮平滑筋腫
12.その他	c-0242	卵巣の良性新生物
12.その他	c-0243	腎尿路の良性新生物
12.その他	c-0244	中枢神経系のその他の新生物
12.その他	c-0245	その他の新生物
12.その他	c-0301	鉄欠乏性貧血
12.その他	c-0302	その他の貧血
12.その他	c-0303	出血性の病態並びにその他の血液及び造血器の疾患
12.その他	c-0304	免疫機構の障害
12.その他	c-0408	栄養失調（症）及びビタミン欠乏症
12.その他	c-0411	体液量減少（症）
12.その他	c-0500	精神及び行動の障害
12.その他	c-0501	血管性及び詳細不明の認知症
12.その他	c-0502	アルコール使用＜飲酒＞による精神及び行動の障害
12.その他	c-0503	その他の精神作用物質使用による精神及び行動の障害
12.その他	c-0504	統合失調症，統合失調症型障害及び妄想性障害
12.その他	c-0505	気分［感情］障害（躁うつ病を含む）
12.その他	c-0506	神経症性障害，ストレス関連障害及び身体表現性障害
12.その他	c-0507	知的障害＜精神遅滞＞
12.その他	c-0508	その他の精神及び行動の障害
12.その他	c-0600	神経系の疾患
12.その他	c-0602	中枢神経系の炎症性疾患
12.その他	c-0603	脊髄性筋萎縮症及び関連症候群
12.その他	c-0604	パーキンソン病
12.その他	c-0605	アルツハイマー病
12.その他	c-0606	多発性硬化症
12.その他	c-0607	てんかん
12.その他	c-0608	片頭痛及びその他の頭痛症候群
12.その他	c-0609	一過性脳虚血発作及び関連症候群
12.その他	c-0612	脳性麻痺及びその他の麻痺性症候群
12.その他	c-0613	自律神経系の障害
12.その他	c-0614	その他の神経系の疾患
12.その他	c-1801	腹痛及び骨盤痛
12.その他	c-1804	頭痛
12.その他	c-1805	老衰
12.その他	c-1806	その他の症状，徴候及び異常臨床所見・異常検査所見で他に分類されないもの
12.その他	c-1907	眼球及び眼窩の損傷
12.その他	c-1908	頭蓋内損傷
12.その他	c-1909	その他の内臓の損傷
12.その他	c-1910	明示された部位及び多部位の挫滅損傷及び外傷性切断
12.その他	c-1911	その他の明示された部位，部位不明及び多部位の損傷
12.その他	c-1912	自然開口部からの異物侵入の作用
12.その他	c-1913	熱傷及び腐食
12.その他	c-1914	薬物，薬剤及び生物学的製剤による中毒
12.その他	c-1915	薬用を主としない物質の毒作用
12.その他	c-1916	虐待症候群
12.その他	c-1917	その他及び詳細不明の外因の作用
12.その他	c-1918	外傷の早期合併症並びに外科的及び内科的ケアの合併症，他に分類されないもの
12.その他	c-1919	損傷，中毒及びその他の外因による影響の続発・後遺症
12.その他	c-2101	検査及び診査のための保健サービスの利用者
12.その他	c-2102	無症候性ヒト免疫不全ウイルス［ＨＩＶ］感染状態
12.その他	c-2103	予防接種
12.その他	c-2104	伝染病に関連する健康障害をきたす恐れのあるその他の者
12.その他	c-2105	避妊管理
12.その他	c-2106	分娩前スクリーニング及びその他の妊娠の管理
12.その他	c-2107	その他の生殖に関連する環境下での保健サービスの利用者
12.その他	c-2108	分娩後のケア及び検査
12.その他	c-2110	特定の処置（歯の補てつを除く）及び保健ケアのための保健サービスの利用者
12.その他	c-2111	腎透析依存
12.その他	c-2112	その他の理由による保健サービスの利用者
12.その他	c-2200	特殊目的用コード
12.その他	c-2210	重症急性呼吸器症候群［ＳＡＲＳ］
12.その他	c-2220	その他の特殊目的用コード
