# Supplementary material for: Analysis of 2897 hospitalization events for patients with chronic kidney disease: results from CKD-JAC study
Source: Clin Exp Nephrol. 2019 Apr 9;23(7):956–68. doi: 10.1007/s10157-019-01730-9 (PMC6555784; doi:10.1007/s10157-019-01730-9)
Supplement: Supplementary file 5 — Supplementary material 5 (XLSX 20 KB) [file 10157_2019_1730_MOESM5_ESM.xlsx]

## Sheet: Supplemental table2
	Analysis of 2897 hospitalization events for patients with chronic kidney disease: Results from CKD-JAC study, Clinical and Experimental Nephrology, Iimuro et al.
	Supplementary Table 2 Breakdown of All Hospitalization Data (2897 Events)
	All hospitalization data (2897 events) with the total number of events and events per 1000 person-years for each CKD-JAC classification and the breakdown of events per 1000 person-years by the major categories of the Japanese Ministry of Health, Labour and Welfare Disease Classifications.
		N	per 1000 person-year
	01. Infectious diseases	226	19.6786
	a-0101，Intestinal infectious diseases	22	1.91562
	a-0102，Tuberculosis	5	0.435368
	a-0103，Viral infections characterized by skin and mucous membrane lesions	11	0.957809
	a-0104，Mycoses	1	0.0870735
	a-0105，Other infectious or parasitic diseases	20	1.74147
	a-0600，Diseases of the nervous system	4	0.348294
	a-0802，Diseases of middle ear and mastoid	4	0.348294
	a-1001，Acute upper respiratory infections	3	0.261221
	a-1002，Viral pneumonia	78	6.79173
	a-1003，Acute bronchiolitis	9	0.783662
	a-1006，Other diseases of the respiratory system	15	1.3061
	a-1101，Dental caries	1	0.0870735
	a-1102，Gingivitis and periodontal diseases	1	0.0870735
	a-1103，Other dental, gingivitis or periodontal diseases	1	0.0870735
	a-1107，Other diseases of the digestive system	3	0.261221
	a-1200，Diseases of the skin and subcutaneous tissue	16	1.39318
	a-1304，Other diseases of the musculoskeletal system or connective tissue	2	0.174147
	a-1403，Other diseases of the genitourinary system	19	1.6544
	a-1800，Symptoms, signs and abnormal clinical and laboratory findings, not elsewhere classified	11	0.957809
	02. Malignant neoplasm	203	17.6759
	a-0201，Malignant neoplasm of stomach	13	1.13196
	a-0202，Malignant neoplasm of colon, rectosigmoid junction and rectum	21	1.82854
	a-0203，Malignant neoplasm of trachea, bronchus and lung	5	0.435368
	a-0204，Other malignant neoplasm	164	14.2801
	03. Endocrine, nutritional and metabolic diseases	191	16.631
	a-0402，Diabetes mellitus	107	9.31686
	a-0403，Other disorders of glucose regulation and pancreatic internal secretion	51	4.44075
	a-1301，Inflammatory polyarthropathies	3	0.261221
	a-1304，Other diseases of the musculoskeletal system or connective tissue	30	2.61221
	04. Diseases of the eye and adnexa	172	14.9766
	a-0701，Catarct	153	13.3222
	a-0702，Other disease of the eye or adnexa	19	1.6544
	05. Diseases of the circulatory system	146	12.7127
	a-0901，Hypertensive diseases	9	0.783662
	a-0904，Cerebral infarction	52	4.52782
	a-0905，Other cerebrovascular diseases	15	1.3061
	a-0906，Other diseases of the circulatory system	70	6.09515
	06. Heart diseases	282	24.5547
	a-0902，Ischaemic heart diseases	151	13.1481
	a-0903，Other heart diseases	131	11.4066
	07. Diseases of the respiratory system	43	3.74416
	a-0600，Diseases of the nervous system *1	12	1.04488
	a-1004，Bronchitis	5	0.435368
	a-1005，Asthma	3	0.261221
	a-1006，Other diseases of the respiratory system	23	2.00269
	08. Diseases of digestive tract	180	15.6732
	a-1104，Gastric ulcer / Duodenal ulcer / Peptic ulcer, site unspecified	12	1.04488
	a-1107，Other diseases of the digestive system	168	14.6283
	09. Hepato-Biliary-Pancreatic diseases	73	6.35637
	a-0105，Other infectious or parasitic diseases *2	4	0.348294
	a-1106，Diseases of liver	11	0.957809
	a-1107，Other diseases of the digestive system	58	5.05026
	10. Diseases of kidney	989	86.1157
	a-1401，Glomerular diseases / Renal tubulo-interstitial diseases / Renal failure	989	86.1157
	11. Others 1	262	22.8133
	a-0600，Diseases of the nervous system	2	0.174147
	a-0804，Diseases of inner ear	2	0.174147
	a-0805，Other disease of the ear	23	2.00269
	a-1006，Other diseases of the respiratory system	5	0.435368
	a-1107，Other diseases of the digestive system	11	0.957809
	a-1200，Diseases of the skin and subcutaneous tissue	8	0.696588
	a-1301，Inflammatory polyarthropathies	6	0.522441
	a-1302，Dorsopathies	17	1.48025
	a-1304，Other diseases of the musculoskeletal system or connective tissue	54	4.70197
	a-1402，Disorders of breast / Inflammatory diseases of female pelvic organs / Noninflammatory disorders of female genital tract / Postoperative adhesions of vagina / Prolapse of vaginal vault after hysterectomy	4	0.348294
	a-1403，Other diseases of the genitourinary system	43	3.74416
	a-1501，Pregnancy with abortive outcome	3	0.261221
	a-1502，Oedema, proteinuria and hypertensive disorders in pregnancy, childbirth and the puerperium	1	0.0870735
	a-1503，Single spontaneous delivery	6	0.522441
	a-1504，Other pregnancy, childbirth or the puerperium	8	0.696588
	a-1700，Congenital malformations, deformations and chromosomal abnormalities	2	0.174147
	a-1800，Symptoms, signs and abnormal clinical and laboratory findings, not elsewhere classified	4	0.348294
	a-1901，Fracture	58	5.05026
	a-1902，Injury, poisoning and certain other consequences of external causes except fracture	4	0.348294
	a-2102，Fitting and adjustment of dental prosthetic device / Fitting and adjustment of orthodontic device	1	0.0870735
	12. Others 2	130	11.3196
	a-0205， In situ neoplasms / Benign neoplasms / Neoplasms of uncertain or unknown behaviour	22	1.91562
	a-0301，Nutritional anaemias / Haemolytic anaemias / Aplastic and other anaemias	6	0.522441
	a-0302，Coagulation defects, purpura and other haemorrhagic conditions / Other diseases of blood and blood-forming organs / Certain disorders involving the immune mechanism	2	0.174147
	a-0403，Other disorders of glucose regulation and pancreatic internal secretion	11	0.957809
	a-0502，Mood [affective] disorders	1	0.0870735
	a-0504，Other mental or behavioural disorders	6	0.522441
	a-0600，Diseases of the nervous system	7	0.609515
	a-1800，Symptoms, signs and abnormal clinical and laboratory findings, not elsewhere classified	37	3.22172
	a-1902，Injury, poisoning and certain other consequences of external causes except fracture	23	2.00269
	a-2103，health services	15	1.3061
	total 11484.55 person-year	2897	252.252
	*1 These twelve cases are all sleep apnea syndrome hospitalization.
	*2 These four cases are all hepatitis B.
